# Supplementary material for: Sex-specificity of the C. elegans metabolome
Source: Springer Nature journal article supplement (doi:10.1038/s41467-023-36040-y), 2023-01-19
Supplement: MOESM1 [file 41467_2023_36040_MOESM1_ESM.pdf]

## Supplementary Information

### Sex-specificity of the *C. elegans* metabolome

Russell N. Burkhardt<sup>1</sup>, Alexander B. Artyukhin<sup>1,2</sup>, Erin Z. Aprison<sup>3</sup>, Brian J. Curtis<sup>1</sup>, Bennett W. Fox<sup>1</sup>, Andreas H. Ludewig<sup>1</sup>, Diana Fajardo Palomino<sup>1</sup>, Jintao Luo<sup>4,5</sup>, Amaresh Chaturbedi<sup>6</sup>, Oishika Panda<sup>1</sup>, Chester J. J. Wrobel<sup>1</sup>, Victor Baumann<sup>1</sup>, Douglas S. Portman<sup>4</sup>, Siu S. Lee<sup>6</sup>, Ilya Ruvinsky<sup>3,\*</sup>, and Frank C. Schroeder<sup>1,\*</sup>

<sup>1</sup>Boyce Thompson Institute and Department of Chemistry and Chemical Biology, Cornell University, Ithaca, New York 14853, United States

<sup>2</sup>Current address: Chemistry Department, College of Environmental Science and Forestry, State University of New York, Syracuse, New York 13210, United States

<sup>3</sup>Department of Molecular Biosciences, Northwestern University, Evanston, IL 60208, United States

<sup>4</sup>Department of Biomedical Genetics, University of Rochester, Rochester, NY, 14642, United States.

<sup>5</sup>Current address: School of Life Sciences, Xiamen University, Xiamen, Fujian, 361102, China.

<sup>6</sup>Department of Molecular Biology and Genetics, Cornell University, Ithaca, New York 14853, United States

\*Correspondence to [fs31@cornell.edu](mailto:fs31@cornell.edu) and [ilya.ruvinsky@northwestern.edu](mailto:ilya.ruvinsky@northwestern.edu)

#### Contents

|                             |    |
|-----------------------------|----|
| 1. Chemical Synthesis       | 2  |
| 2. Supplementary Figures    | 6  |
| 3. NMR Spectra              | 33 |
| 4. Supplementary References | 43 |

## 1. Chemical Synthesis

**Chemicals and General Synthetic Procedures.** Unless stated otherwise, all chemicals purchased for use were obtained from MilliporeSigma (Burlington, MA). *L*-isoleucine *tert*-butyl ester hydrochloride, trifluoroacetic acid, and *N,N'*-dicyclohexylcarbodiimide (DCC) were obtained from TCI (Portland, OR), 4-dimethylaminopyridine was purchased from Fluka, and *L*-tryptophan *tert*-butyl ester hydrochloride was purchased from Chem-Impex. 1-hydroxybenzotriazole (HOBt) was obtained from Fluka (Mexico City, Mexico). All deuterated solvents were obtained from Cambridge Isotopes. All non-deuterated solvents were obtained from Fisher Sci (Waltham, MA). Abbreviations used for solvents are as follows: chloroform (CHCl<sub>3</sub>), dichloromethane (DCM), dimethylsulfoxide (DMSO), and methanol (MeOH).

Unless stated otherwise, all reactions were performed under argon atmosphere in flame-dried glassware. All commercially available reagents were used as purchased unless otherwise stated. All solvents were dried over activated 3Å sieves for a minimum of 24 h unless used in reactions where aqueous reagents were involved. Thin-layer chromatography (TLC) was performed with J.T. Baker Silica Gel IB2-F plastic-backed plates. Reversed-phase column chromatography was performed using Teledyne ISCO CombiFlash Rf and Rf+ systems with Teledyne ISCO RediSep Rf and Rf Gold silica columns. Nuclear Magnetic Resonance (NMR) spectra were recorded on a Varian INOVA 600 (600 MHz) or Bruker AV 500 (500 MHz) in the Cornell University NMR Facility. <sup>1</sup>H NMR chemical shifts are reported in ppm (δ) relative to the residual solvent peaks (7.26 ppm for CDCl<sub>3</sub>, 3.31 ppm for CD<sub>3</sub>OD, and 2.50 for D<sub>6</sub>-DMSO) and <sup>13</sup>C NMR shifts relative to the residual solvent peaks (77.16 for CDCl<sub>3</sub> and 49.00 for CD<sub>3</sub>OD, and 39.52 for D<sub>6</sub>-DMSO). All NMR data processing was done using MNOVA 14.2.3 (<https://mestrelab.com/>).

### 1.1. Synthesis of acemta#1 and acemta#2

#### (2*O*)- and (3*O*)-acetyl-*S*-methylthioadenosine (acemta#1, 4, and acemta#2, 5)

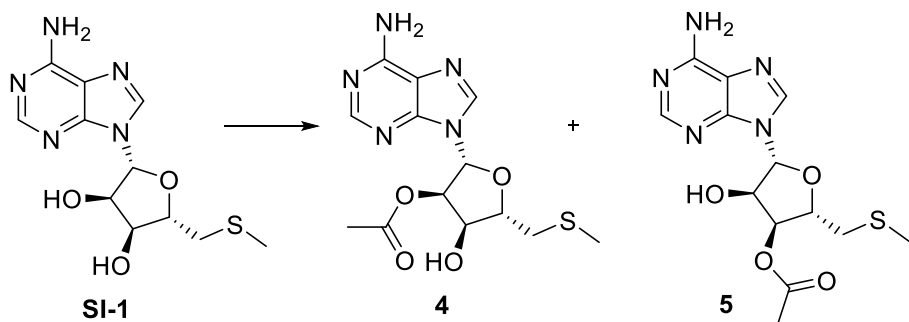

*S*-Methylthioadenosine (MTA, **SI-1**, 10 mg, 0.0336 mmol) was dissolved in pyridine (150 μL) and stirred at ambient temperature. Acetic anhydride (34 μL, 0.0336 mmol) was added and the reaction stirred. After 2 h (MeOH, 2 mL) was added and the reaction stirred 30 min. The reaction was diluted with CHCl<sub>3</sub> and washed with 2% aqueous acetic acid (1×4 mL) and saturated sodium bicarbonate (1×6 mL) then dried over magnesium sulfate (MgSO<sub>4</sub>), filtered, and concentrated under reduced pressure. The resulting oil was purified by flash chromatography on silica. Elution with a gradient of 0-40% DCM/MeOH yielded the diacetylated product (10 mg, 74.9%) and a 1:3 mixture of the (2*O*)- and (3*O*)-acetylated products (acemta#1, 4, and acemta#2, 5, 2.5 mg, 20.9%) as an oil.

**(2O)-acetyl S-methylthioadenosine (4, acemta#1):**

**<sup>1</sup>H NMR (CDCl<sub>3</sub>, 500 MHz):** δ (ppm) 8.31 (s, 1H), 7.98 (s, 1H), 6.09 (d, *J* = 3.4 Hz, 1H), 5.75 (dd, *J* = 5.6, 3.4 Hz, 1H), 4.83 (t, *J* = 6.3 Hz, 1H), 4.25 (q, *J* = 6.0 Hz, 1H), 2.99 (dd, *J* = 14.2, 5.2 Hz, 1H), 1.85-2.95 (m, 1H), 2.17 (s, 3H), 2.15 (s, 3H).

**<sup>13</sup>C NMR (CDCl<sub>3</sub>, 125 MHz):** δ (ppm) 170.4, 155.5, 153.1, 149.5, 139.7, 120.0, 87.2, 83.2, 76.1, 72.2, 36.4, 20.9, 16.9.

**HRMS (ESI) *m/z*:** Calculated: (M+H)<sup>+</sup> 340.1074. Actual: 340.1049. Δ ppm: -7.30.

**(3O)-acetyl S-methylthioadenosine (5, acemta#2):**

**<sup>1</sup>H NMR (CDCl<sub>3</sub>, 500 MHz):** δ (ppm) 8.25 (s, 1H), 8.02 (s, 1H), 5.94 (d, *J* = 6.7 Hz, 1H), 5.38 (dd, *J* = 5.8, 2.8 Hz, 1H), 4.97 (t, *J* = 6.3 Hz, 1H), 4.48 (td, *J* = 5.6, 2.8 Hz, 1H), 2.90 (t, *J* = 5.5 Hz, 2H), 2.21 (s, 3H), 2.16 (s, 3H).

**<sup>13</sup>C NMR (CDCl<sub>3</sub>, 125 MHz):** δ (ppm) 170.6, 155.6, 152.7 (2C), 139.3, 89.5, 83.5, 75.0, 73.8, 37.1, 21.1, 17.0.

**1.2. Synthesis of medip#1**

***N,N*-Dimethyltryptophan (24)**

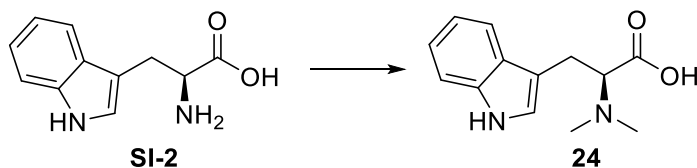

Based on a synthesis for *N,N*-dimethyltryptamine<sup>9</sup>, tryptophan (**SI-2**, 1.0 g, 4.9 mmol) was stirred in MeOH (30 mL) at 0 °C under an atmosphere of argon. Sodium cyanoborohydride (1.5 g, 24 mmol) was added followed by formaldehyde solution (1.54 mL, 36%, 20 mmol) and the reaction was stirred for 36 h. The reaction was concentrated and recrystallized from MeOH to yield **24** (636 mg, 56%) as white crystals that were used without further purification.

**<sup>1</sup>H NMR (D<sub>6</sub>-DMSO, 500 MHz):** δ (ppm) 10.83 (s, 1H), 7.54 (d, *J* = 7.8 Hz, 1H), 7.32 (d, *J* = 7.8 Hz, 1H), 7.06 (td, *J* = 7.2, 1.0 Hz, 1H), 6.97 (td, *J* = 7.2, 1.0 Hz, 1H), 3.47 (dd, *J* = 8.0, 6.1 Hz, 1H), 3.34 (dd, *J* = 14.8, 7.9 Hz, 1H), 2.97 (dd, *J* = 14.7, 6.2 Hz), 2.41 (s, 6H).

**<sup>13</sup>C NMR (D<sub>6</sub>-DMSO, 125 MHz):** δ (ppm) 171.0, 136.1, 127.2, 123.4, 120.9, 118.3, 118.2, 111.3, 110.5, 68.4, 41.3, 24.3.

**HRMS (ESI) *m/z*:** Calculated: (M+H)<sup>+</sup> 233.1289. Actual: 233.1270. Δ ppm: 4.27.

### medip#1-*tert*-butyl ester (SI-3)

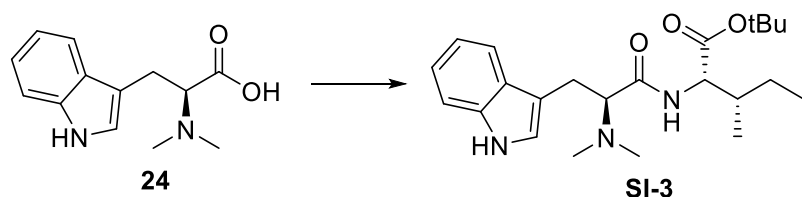

HOBt (11 mg, 0.0647 mmol), triethylamine (15  $\mu$ L, 0.108 mmol), DCC (11.6 mg, 0.056 mmol), and isoleucine-*tert*-butyl ester (20 mg, 0.086 mmol) were added to a solution of *N,N*-dimethyltryptophan (**24**, 10 mg, 0.043 mmol) in DCM (1 mL) and DMF (1 mL) and stirred overnight. The reaction was quenched with water (1 mL), extracted with DCM (3 $\times$ 5 mL), dried over  $\text{MgSO}_4$ , filtered, and concentrated under reduced pressure. The resulting solid was purified via flash chromatography on silica gel. Elution with a gradient of 0-10% DCM/MeOH yielded a mixture of medip#1-*tert*-butyl ester (**SI-3**) and isoleucine-*tert*-butyl ester (27.8 mg), which was used without further purification.

### medip#1 (**26**)

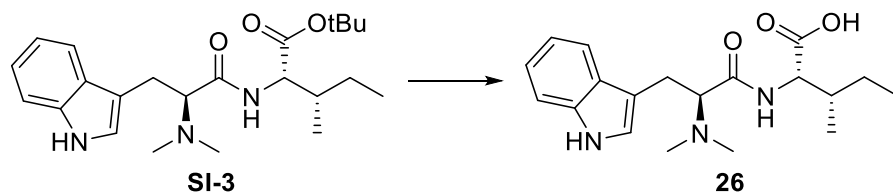

TFA (530  $\mu$ L, 6.88 mmol) was added to a stirring solution of medip#1-*tert*-butyl ester (**SI-3**) and isoleucine-*tert*-butyl ester (27.8 mg) in DCM (530  $\mu$ L) and stirred for 4 h. The reaction was then concentrated under reduced pressure. The resulting oil was purified via flash chromatography on silica gel. Elution with a gradient of 0-20% DCM/MeOH yielded medip#1 (**26**) as a white solid (14.9 mg, ~100%).

**$^1\text{H}$  NMR ( $\text{CD}_3\text{OD}$ , 500 MHz):**  $\delta$  (ppm) 7.59 (d,  $J$  = 8.0 Hz, 1H), 7.36 (d,  $J$  = 8.1 Hz, 1H), 7.22 (s, 1H), 7.12 (td,  $J$  = 7.3, 1 Hz, 1H), 7.05 (td,  $J$  = 7.3, 1 Hz, 1H), 4.29 (d,  $J$  = 5.5 Hz, 1H), 4.22 (dd,  $J$  = 8.9, 5.3 Hz, 1H), 3.50 (dd,  $J$  = 14.6, 5.2 Hz, 1H), 3.42 (dd,  $J$  = 14.6, 8.9 Hz, 1H), 2.98 (s, 6H), 1.78-1.89 (m, 1H), 1.35-1.48 (m, 1H), 1.08-1.18 (m, 1H), 0.89 (t,  $J$  = 7.5 Hz, 3H), 0.88 (d,  $J$  = 6.8 Hz, 3H).

**$^{13}\text{C}$  NMR ( $\text{CD}_3\text{OD}$ , 125 MHz):**  $\delta$  (ppm) 173.2, 168.5, 138.1, 128.2, 125.6, 120.3, 118.8, 112.6, 107.2, 69.5, 58.4, 54.8, 42.4, 38.4, 26.2, 25.7, 15.9, 11.7.

**HRMS (ESI)  $m/z$ :** Calculated:  $(\text{M}+\text{H})^+$  346.2125. Actual: 346.2102.  $\Delta$  ppm: 6.77.

### 1.3. Synthesis of Trp-Ile and Ile-Trp

#### L-Tryptophanyl-L-isoleucine (SI-5)

To a vial containing *N*-(*tert*-butoxycarbonyl)-L-tryptophan (50 mg, 0.16 mmol, 1.0 equiv.), L-isoleucine *tert*-butyl ester hydrochloride (48 mg, 0.21 mmol, 1.3 equiv.), 1-ethyl-3-(3'-dimethylaminopropyl)carbodiimide (EDC) hydrochloride (108 mg, 0.56 mmol, 3.4 equiv.) and 4-dimethylaminopyridine (DMAP, 40 mg, 0.33 mmol, 2.0 equiv.) was added about 1 mL of DCM. The resulting solution was stirred at room temperature overnight and concentrated in vacuo. Flash column chromatography on silica using a gradient of 2-54% ethyl acetate in n-hexane afforded [*N*-(*tert*-butoxycarbonyl)-L-tryptophanyl]-L-isoleucine *tert*-butyl ester (**SI-4**) (73 mg, 94%).

To a solution of **SI-4** (33 mg, 0.069 mmol, 1 equiv.) in about ½ mL of DCM was added trifluoroacetic acid (TFA, 1.3 mL, 17 mmol, 247 equiv.). The resulting solution was stirred for 1 h and then concentrated to dryness in vacuo. Flash column chromatography on silica using a gradient of 2-30% MeOH in DCM followed by flash column chromatography on silica using a gradient of 2-10% MeCN in water afforded **SI-5** (12 mg, 55%).

**<sup>1</sup>H NMR (500 MHz, methanol-*d*<sub>4</sub>):** δ 7.71 (d, *J* = 7.9 Hz, 1H), 7.36 (d, *J* = 8.1 Hz, 1H), 7.21 (s, 1H), 7.12 (ddd, *J* = 8.2, 7.0, 1.2 Hz, 1H), 7.06 (ddd, *J* = 8.0, 7.0, 1.0 Hz, 1H), 4.29 (d, *J* = 5.3 Hz, 1H), 4.20 (dd, *J* = 8.5, 5.3 Hz, 1H), 3.46 (dd, *J* = 15.1, 5.2 Hz, 1H), 3.19 (dd, *J* = 15.1, 8.5 Hz, 1H), 1.95 – 1.85 (m, 1H), 1.62 – 1.51 (m, 1H), 1.22 – 1.11 (m, 1H), 0.97 – 0.88 (m, 6H).

**<sup>13</sup>C NMR (126 MHz, methanol-*d*<sub>4</sub>):** δ 170.07, 138.31, 128.42, 125.76, 122.81, 120.24, 119.29, 112.51, 108.31, 61.07, 55.04, 39.07, 28.93, 26.18, 16.32, 12.17.

#### L-Isoleuciny-L-tryptophan (SI-7)

To a vial containing *N*-(*tert*-butoxycarbonyl)-L-isoleucine (51 mg, 0.22 mmol, 1.0 equiv.), L-tryptophan *tert*-butyl ester hydrochloride (84 mg, 0.28 mmol, 1.3 equiv.), EDC hydrochloride (142 mg, 0.74 mmol, 3.4 equiv.) and DMAP (54 mg, 0.44 mmol, 2.0 equiv.) was added 4 mL of DCM. The resulting solution was stirred at room temperature overnight and concentrated in vacuo. Flash column chromatography on silica using a gradient of 2-36% ethyl acetate in n-hexane afforded [*N*-(*tert*-butoxycarbonyl)-L-isoleuciny]-L-tryptophan *tert*-butyl ester (**SI-6**) (101 mg, 97%).

To a solution of **SI-6** (50 mg, 0.11 mmol, 1 equiv.) in about ½ mL of DCM was added TFA (2.0 mL, 26 mmol, 245 equiv.). The resulting solution was stirred for 1 h and then concentrated to dryness in vacuo. Flash column chromatography on silica using a gradient of 2-20% MeCN in water afforded **SI-7** (20 mg, 59%).

**<sup>1</sup>H NMR (500 MHz, methanol-*d*<sub>4</sub>):** δ 7.63 (d, *J* = 7.9 Hz, 1H), 7.29 (d, *J* = 8.1 Hz, 1H), 7.13 (s, 1H), 7.05 (t, *J* = 7.5 Hz, 1H), 6.98 (t, *J* = 7.4 Hz, 1H), 4.62 (dd, *J* = 7.7, 5.0 Hz, 1H), 3.55 (d, *J* = 5.3 Hz, 1H), 3.38 (dd, *J* = 14.7, 5.0 Hz, 1H), 3.21 (dd, *J* = 14.7, 7.8 Hz, 1H), 1.88 – 1.79 (m, *J* = 5.7 Hz, 1H), 1.51 – 1.40 (m, 1H), 1.17 – 1.06 (m, 1H), 0.93 (d, *J* = 6.9 Hz, 3H), 0.86 (t, *J* = 7.3 Hz, 3H).

**<sup>13</sup>C NMR (126 MHz, methanol-*d*<sub>4</sub>):** δ 177.98, 169.62, 137.96, 129.24, 124.40, 122.16, 119.59, 112.12, 111.98, 59.45, 57.23, 38.18, 29.12, 25.17, 15.26, 11.72.

## 2. Supplementary Figures

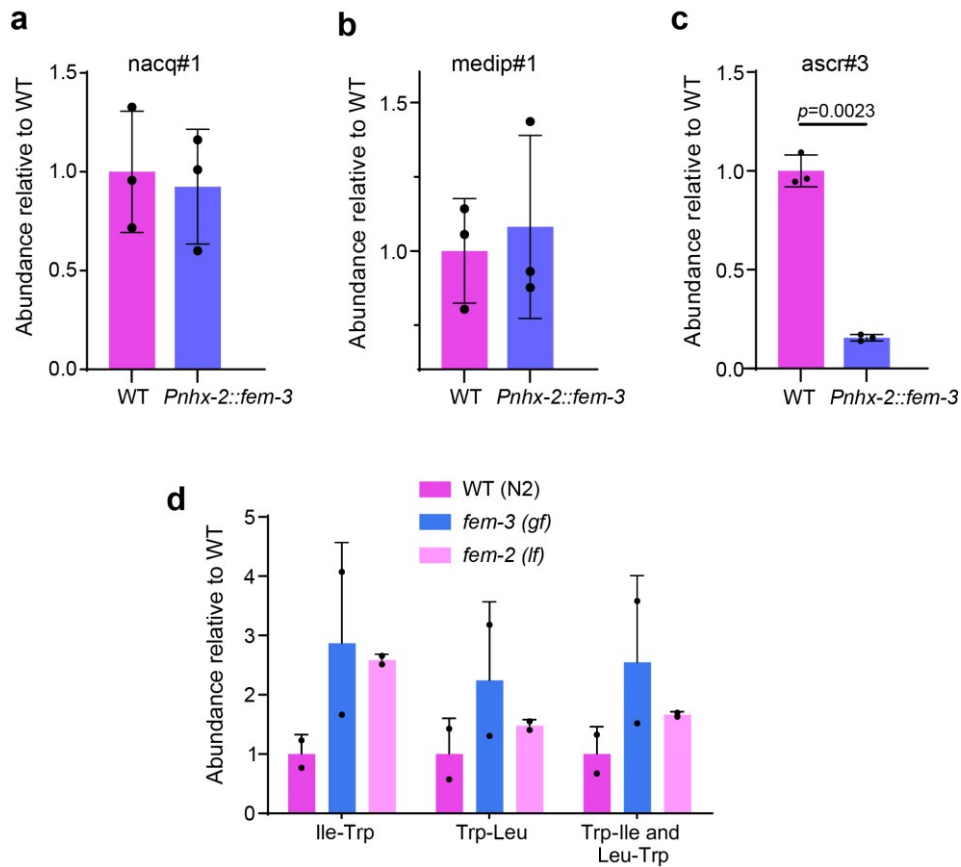

**Supplementary Figure 1. Relative abundances of *nacq#1*, *medip#1*, and *medip#1*-related dipeptides in sex mutants.** **a, b**, Relative abundances of *nacq#1* (**a**) and *medip#1* (**b**) in WT hermaphrodites and intestinally masculinized *Pnhx-2::fem-3* hermaphrodites, *exo*-metabolome. **c**, Relative abundances of *ascr#3* in WT hermaphrodites and intestinally masculinized *Pnhx-2::fem-3* hermaphrodites, *exo*-metabolome. **d**, Relative abundances of *medip#1*-related non-methylated dipeptides in *endo*-metabolome extracts of *fem-3 (gf)* and *fem-2 (lf)* mutants compared to WT hermaphrodites. Bars represent mean  $\pm$  s.e.m. with two or three independent biological replicates; *p* values were calculated by two-sided Welch *t*-tests. Source data are provided as a Source Data file.

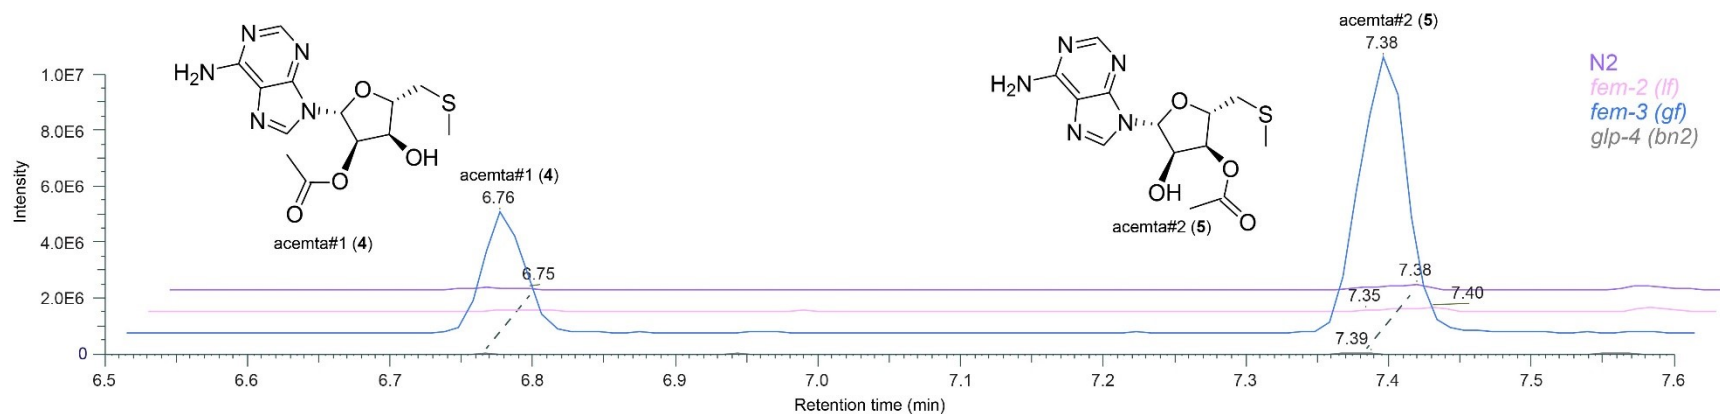

**Supplementary Figure 2. Extracted ion chromatograms (EICs) of acemta#1 (4) and acemta#2 (5).** EIC (ESI+) of  $m/z$  340.1074 in N2 and *him-5* endo-metabolome samples showing peaks for acemta#1 (6.76 min) and acemta#2 (7.38 min) and MS2 spectrum for acemta#2 acquired from a *fem-3* (*gf*) endo-metabolome sample.

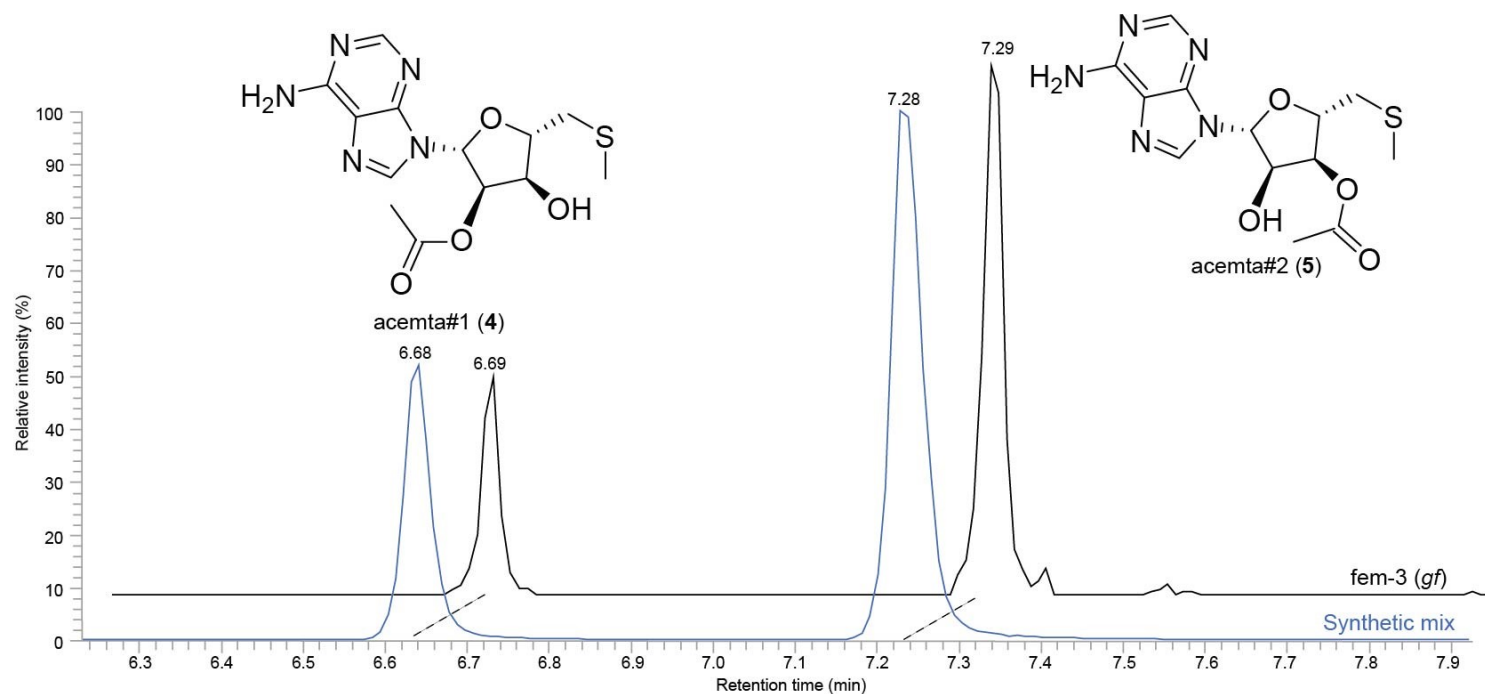

**Supplementary Figure 3. EICs of natural and synthetic acemta#1 (4) and acemta#2 (5).** EIC (ESI+) of  $m/z$  340.1074 in a *fem-3 (gf)* endo-metabolome sample (black) and a synthetic standard containing a mixture of acemta#1 and acemta#2 (blue).



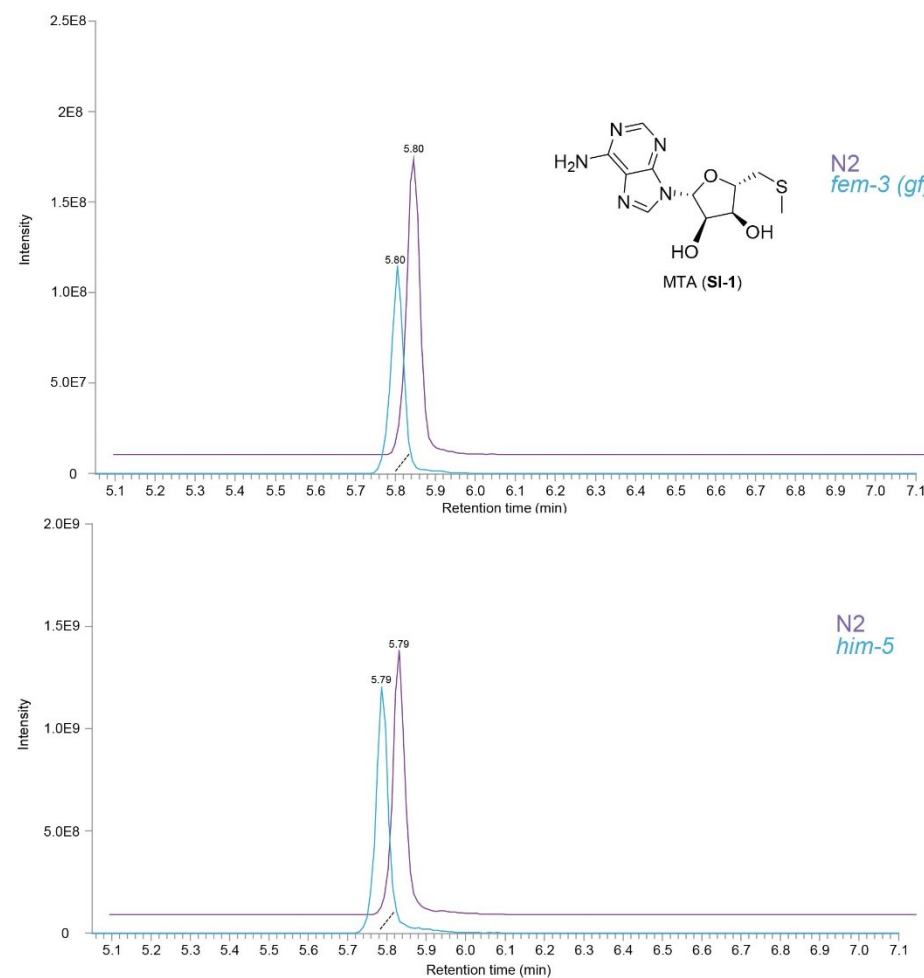

**Supplementary Figure 4. The abundance of methylthioadenosine is not sex-dependent.** Comparison of signal intensity of putative precursor to acemta derivatives (**4** and **5**), methylthioadenosine (MTA, **SI-1**) for WT, *fem-3 (gf)*, and *him-5* endo-metabolome samples reveals very little differences. Note: the comparisons were done via biological replicates of WT *C. elegans*, notable by the differences in signal intensity between samples.

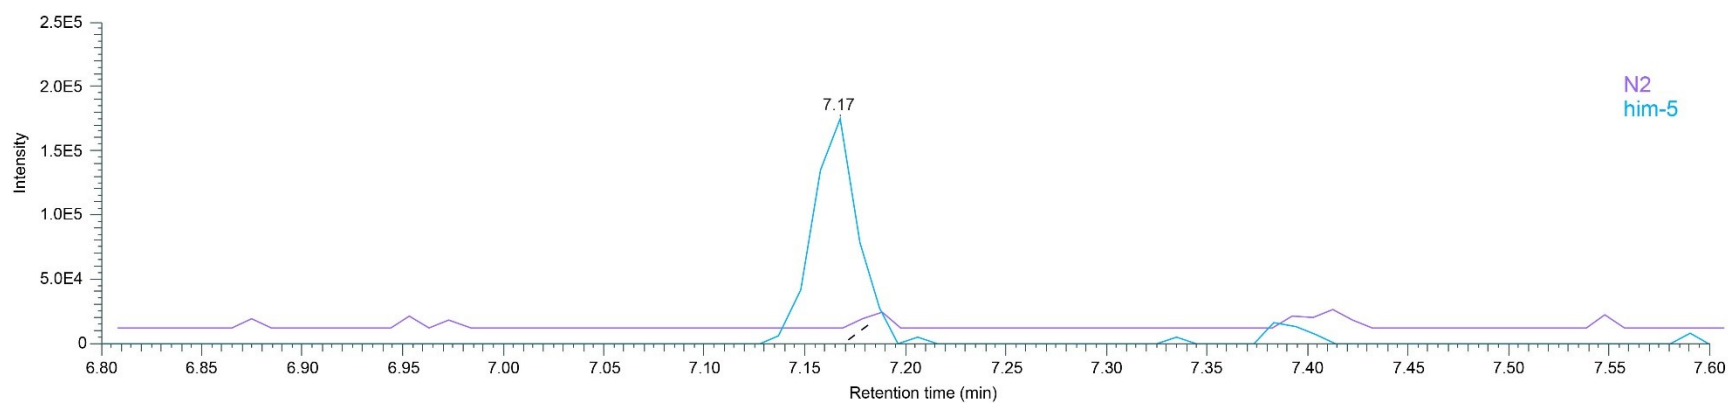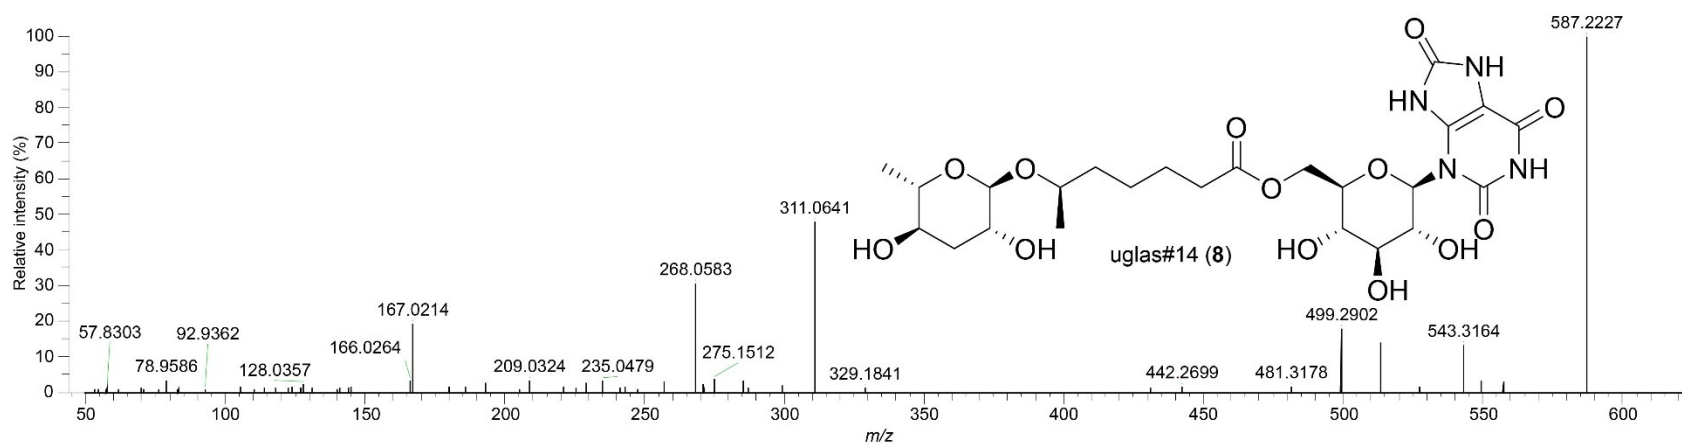

**Supplementary Figure 5. EICs and MS2 spectrum of uglas#14 (8).** EIC (ESI-) of  $m/z$  587.2206 in WT and *him-5* endo-metabolome samples showing peaks for uglas#14 and MS2 spectrum (ESI-) for uglas#14 acquired from a *him-5* endo-metabolome sample.

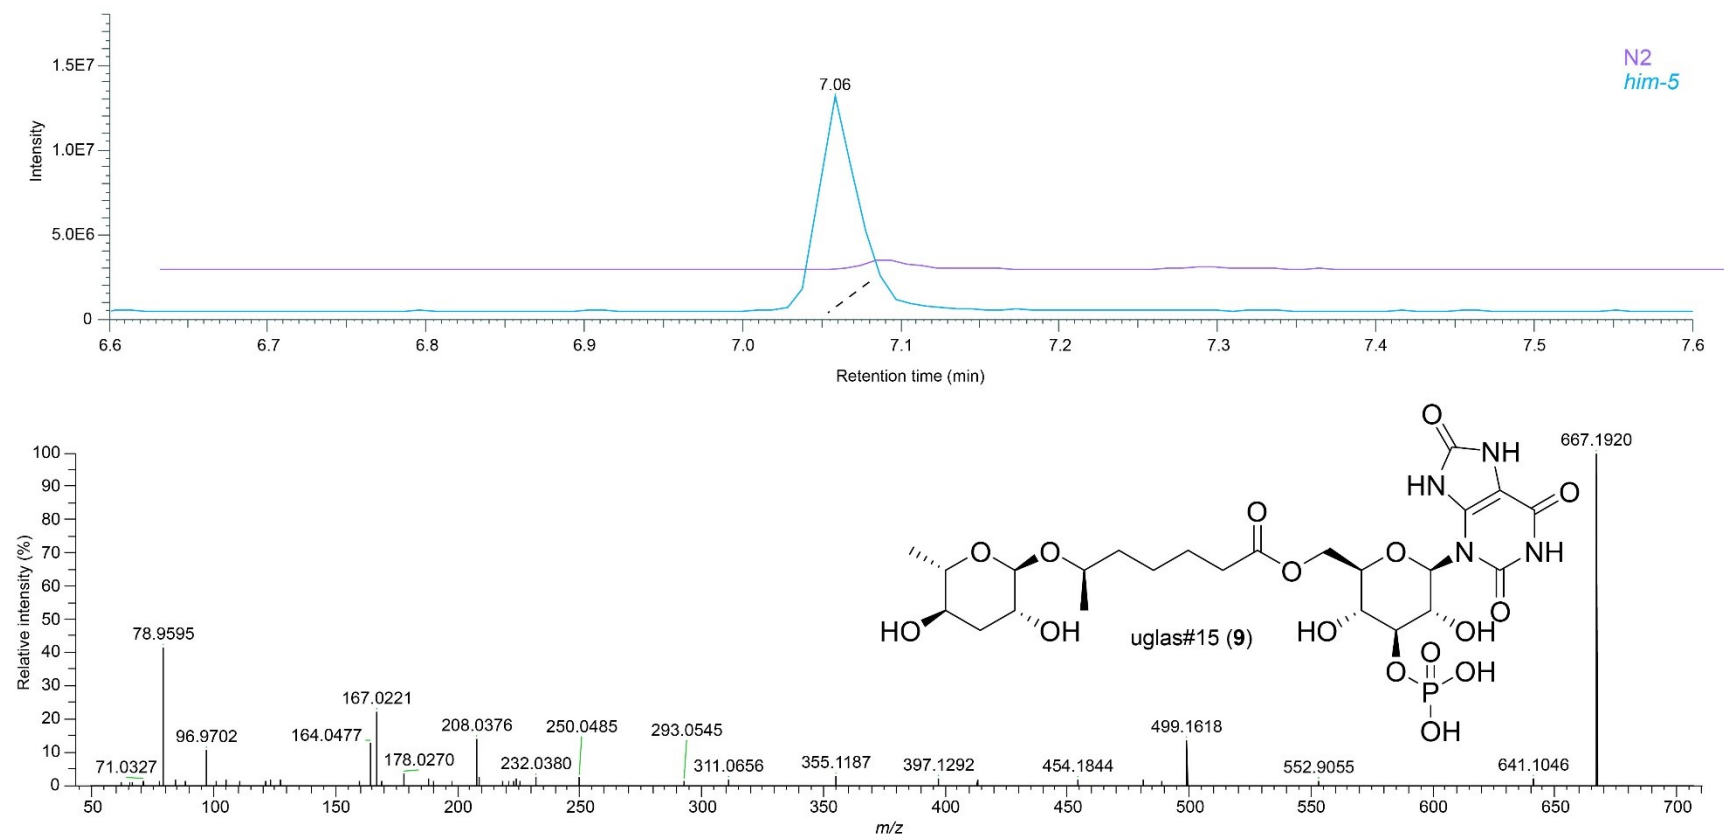

**Supplementary Figure 6. EICs and MS2 spectrum of uglas#15 (9).** EIC (ESI-) of  $m/z$  667.1869 in WT and *him-5* endo-metabolome samples showing peaks for uglas#15 and MS2 spectrum (ESI-) for uglas#15 acquired from a *him-5* endo-metabolome sample.

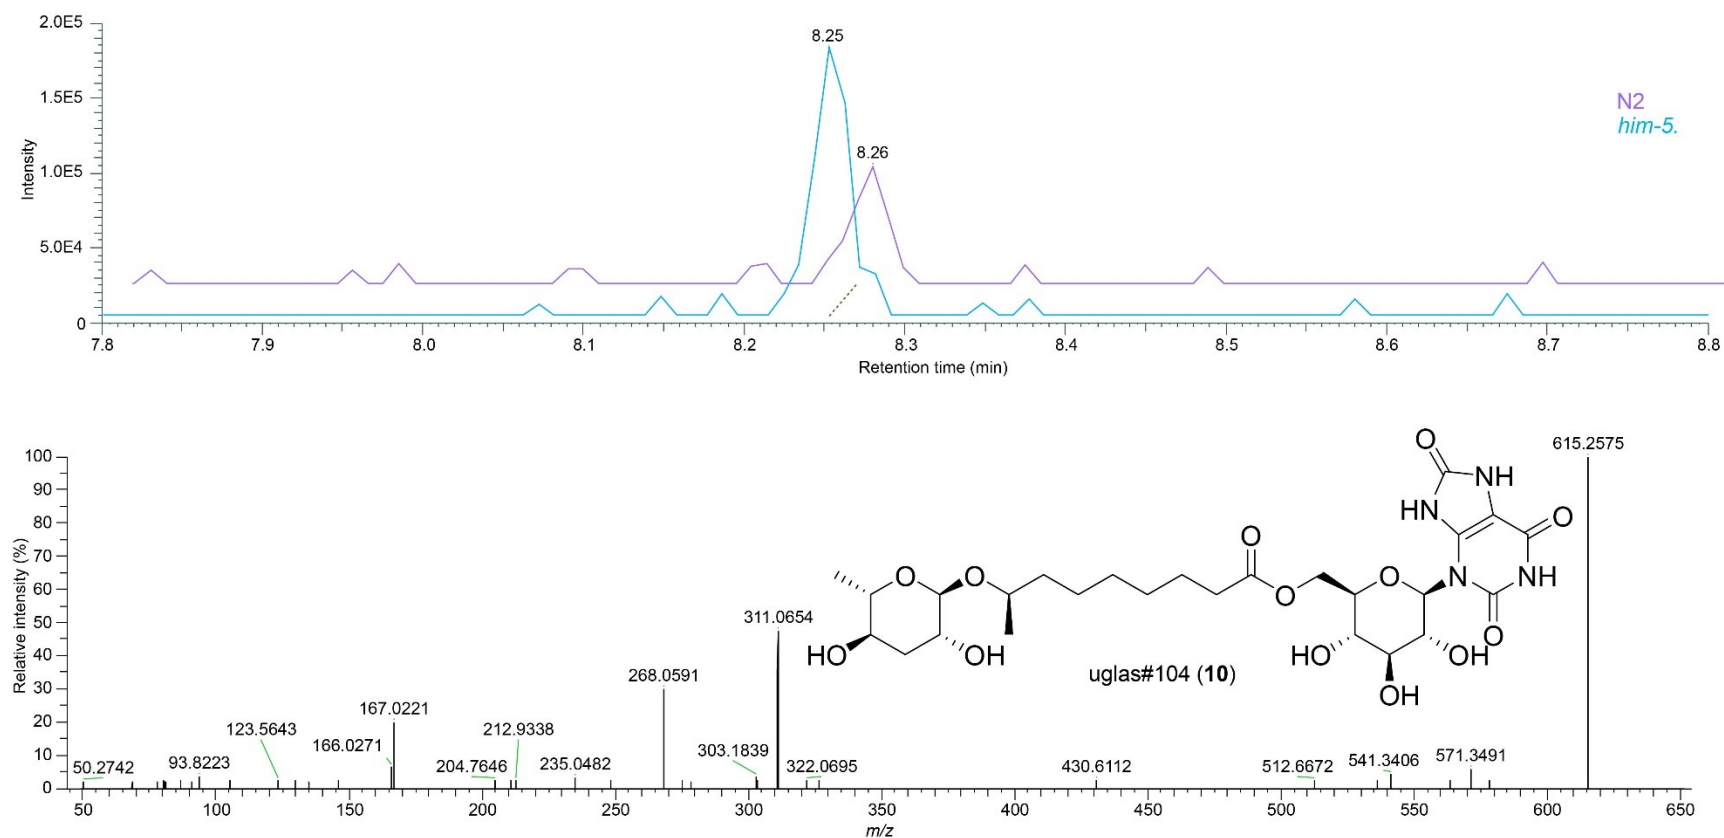

**Supplementary Figure 7. EICs and MS2 spectrum of uglas#104 (10).** EIC (ESI-) of  $m/z$  615.2519 in WT and *him-5* endo-metabolome samples showing peaks for uglas#104 and MS2 spectrum (ESI-) for uglas#104 acquired from a *him-5* endo-metabolome sample.

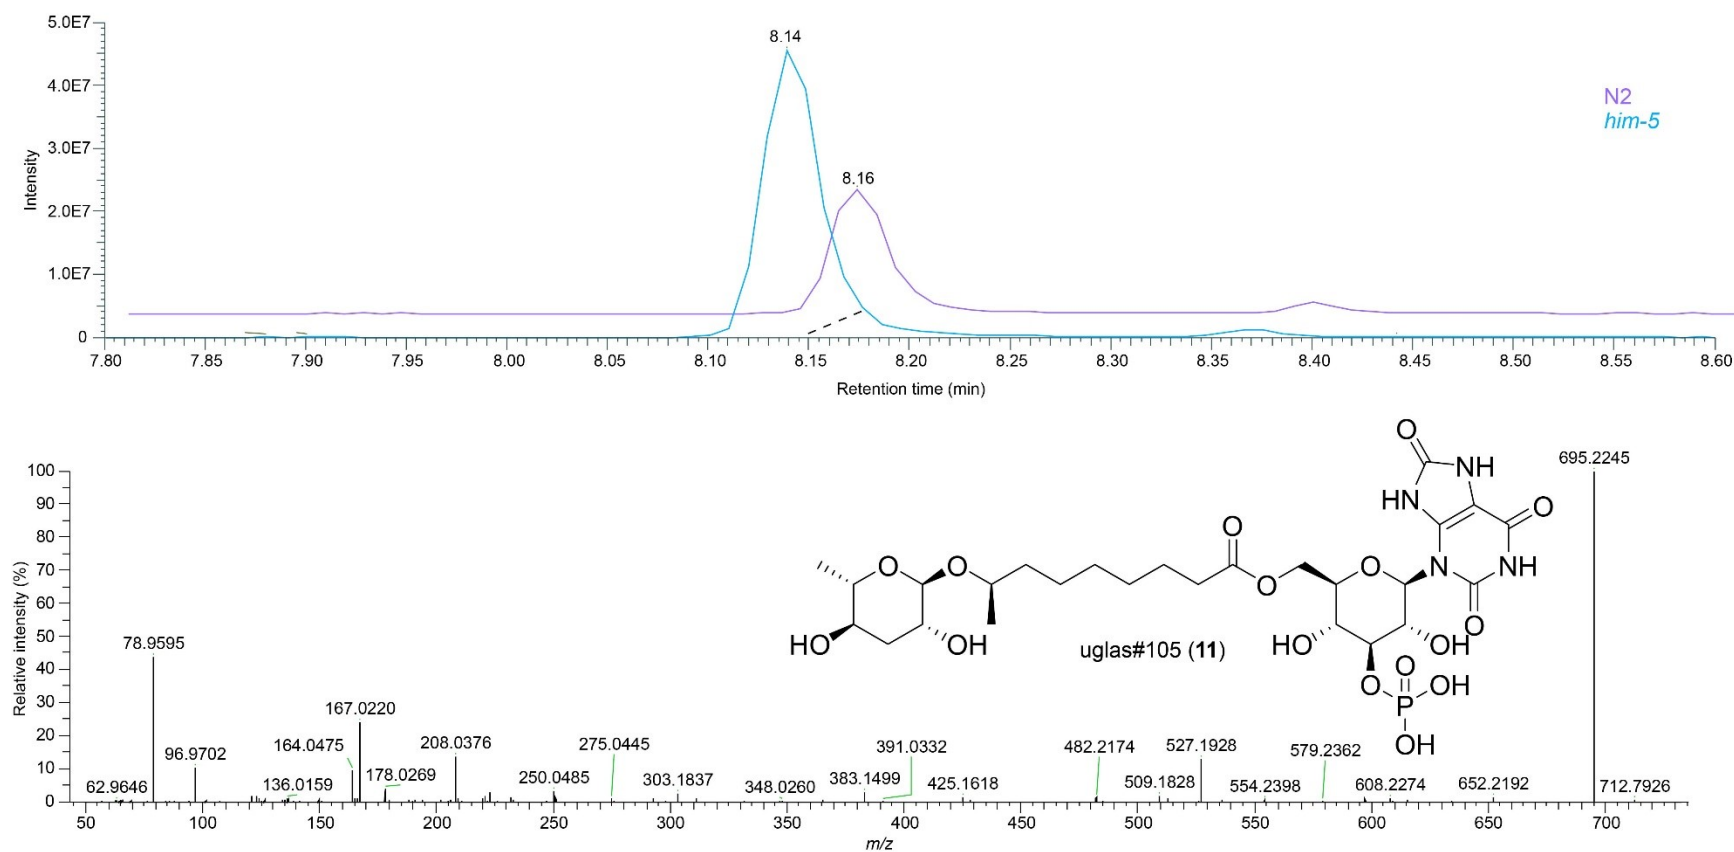

**Supplementary Figure 8. EICs and MS2 spectrum of uglas#105 (11).** EIC (ESI-) of  $m/z$  695.2182 in WT and *him-5* endo-metabolome samples showing peaks for uglas#105 and MS2 spectrum (ESI-) for uglas#105 acquired from a *him-5* endo-metabolome sample.

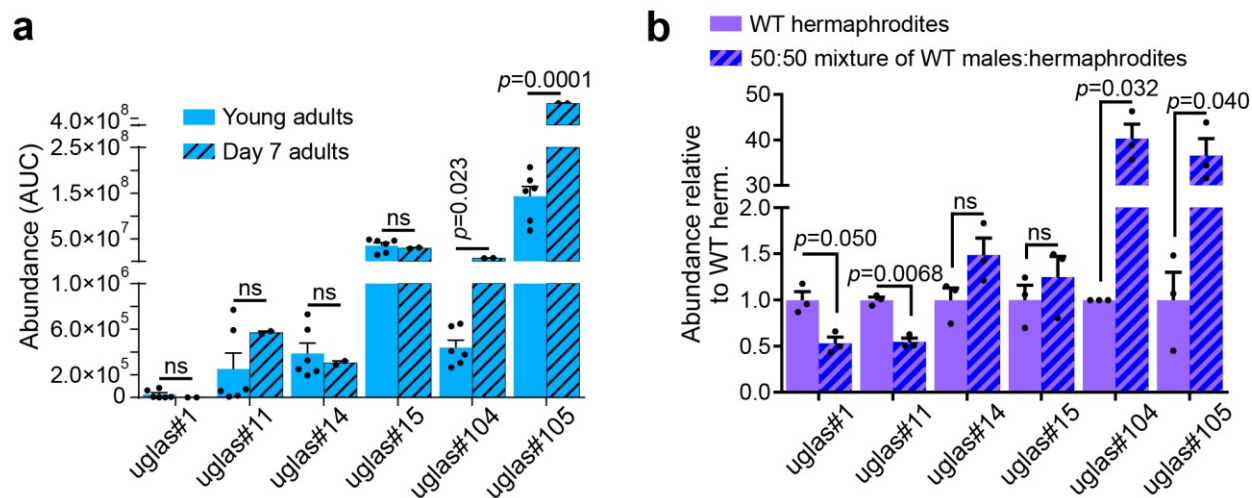

**Supplementary Figure 9. Relative abundances of uglas-family metabolites in the endo-metabolomes.** **a**, Young adults compared to day-7 adults. **b**, Small plate-based samples of WT hermaphrodites and 50:50 mixtures of males and hermaphrodites. Bars represent mean  $\pm$  s.e.m. with six (**a**, young adults), two (**a**, day-7 adults), or three (**b**) independent biological replicates;  $p$  values were calculated by two-sided Welch  $t$ -tests with Holm-Šídák correction; ns, not significant. Source data are provided as a Source Data file.

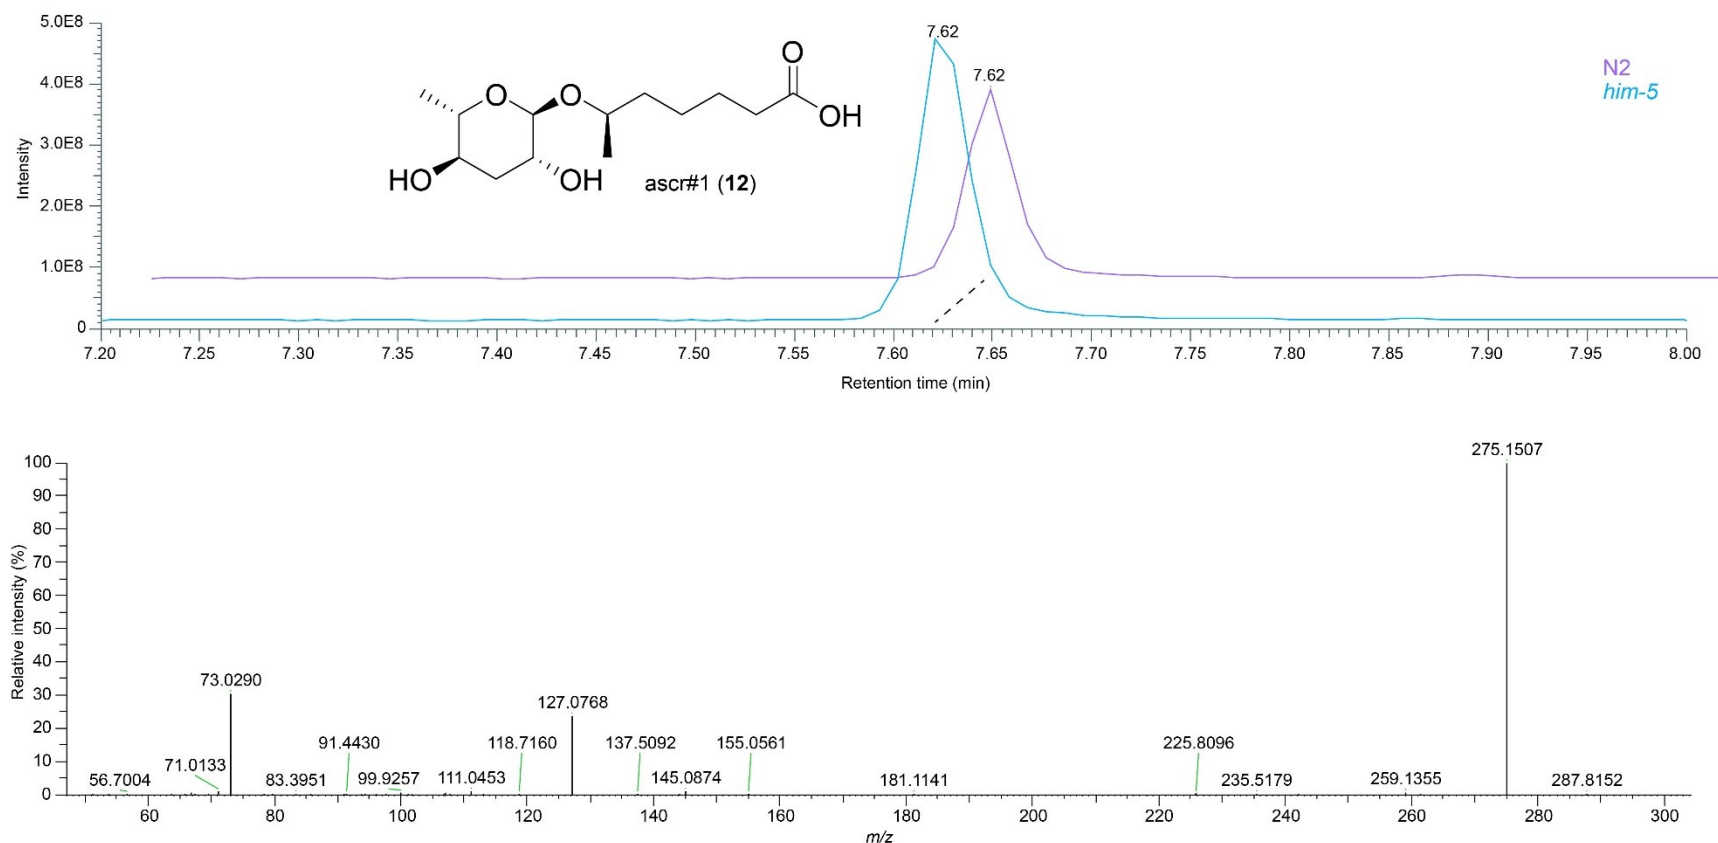

**Supplementary Figure 10. EICs and MS2 spectrum of ascr#1 (12).** EIC (ESI-) of  $m/z$  275.1500 in WT and *him-5* exo-metabolome samples showing peaks for ascr#1 and MS2 spectrum (ESI-) for ascr#1 acquired from a *him-5* exo-metabolome sample.

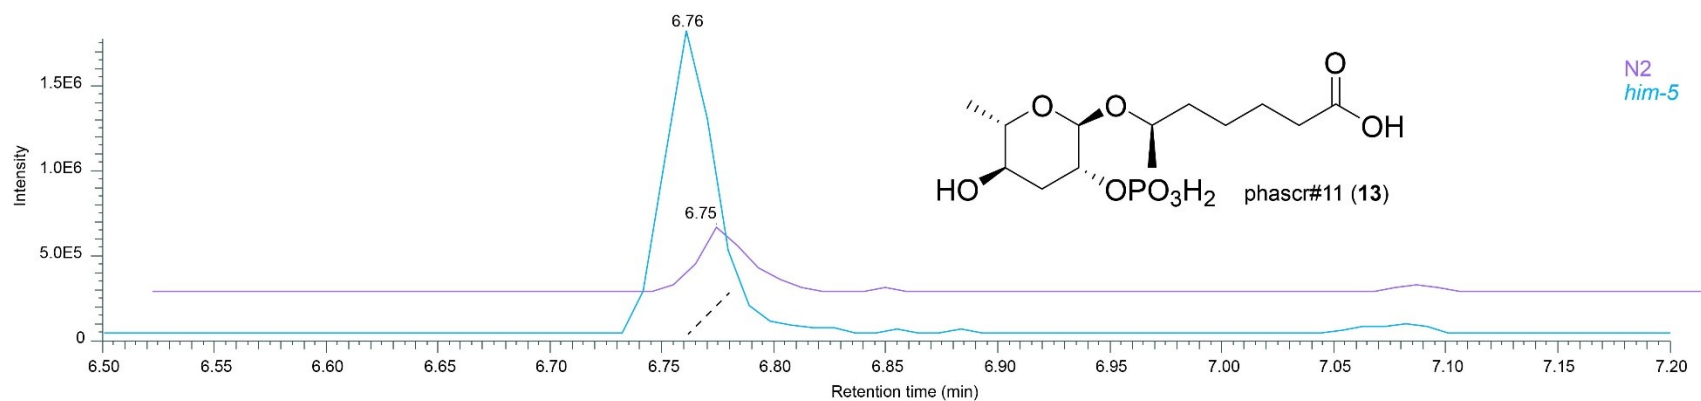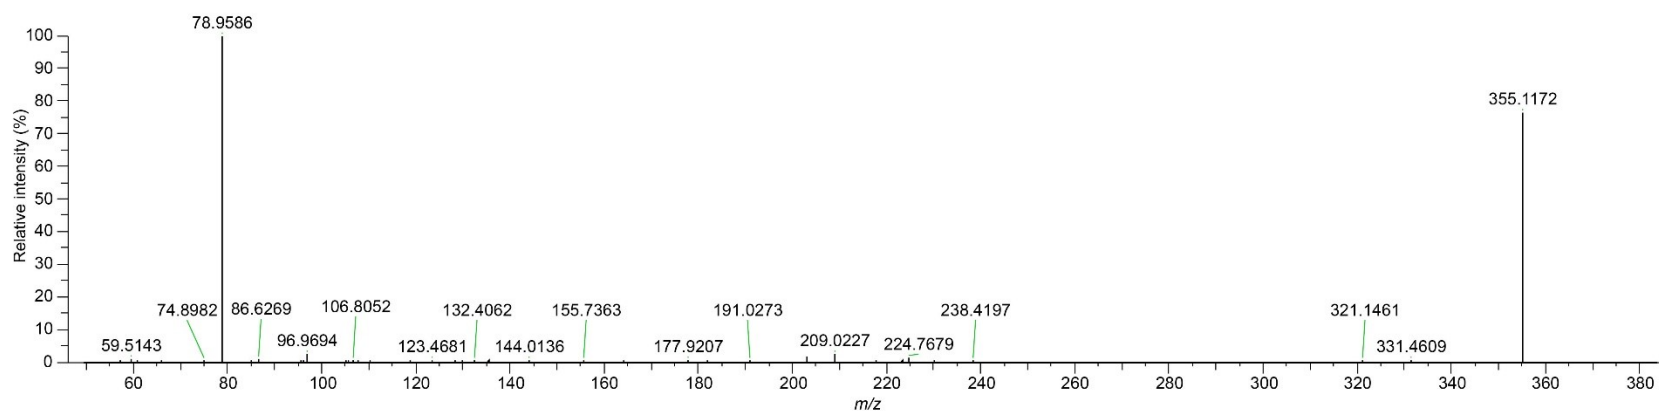

**Supplementary Figure 11. EICs and MS2 spectrum of phascr#11 (13).** EIC (ESI-) of  $m/z$  355.1168 in WT and *him-5* exo-metabolome samples showing peaks for phascr#11 and MS2 spectrum (ESI-) for phascr#11 acquired from a *him-5* exo-metabolome sample<sup>10</sup>.



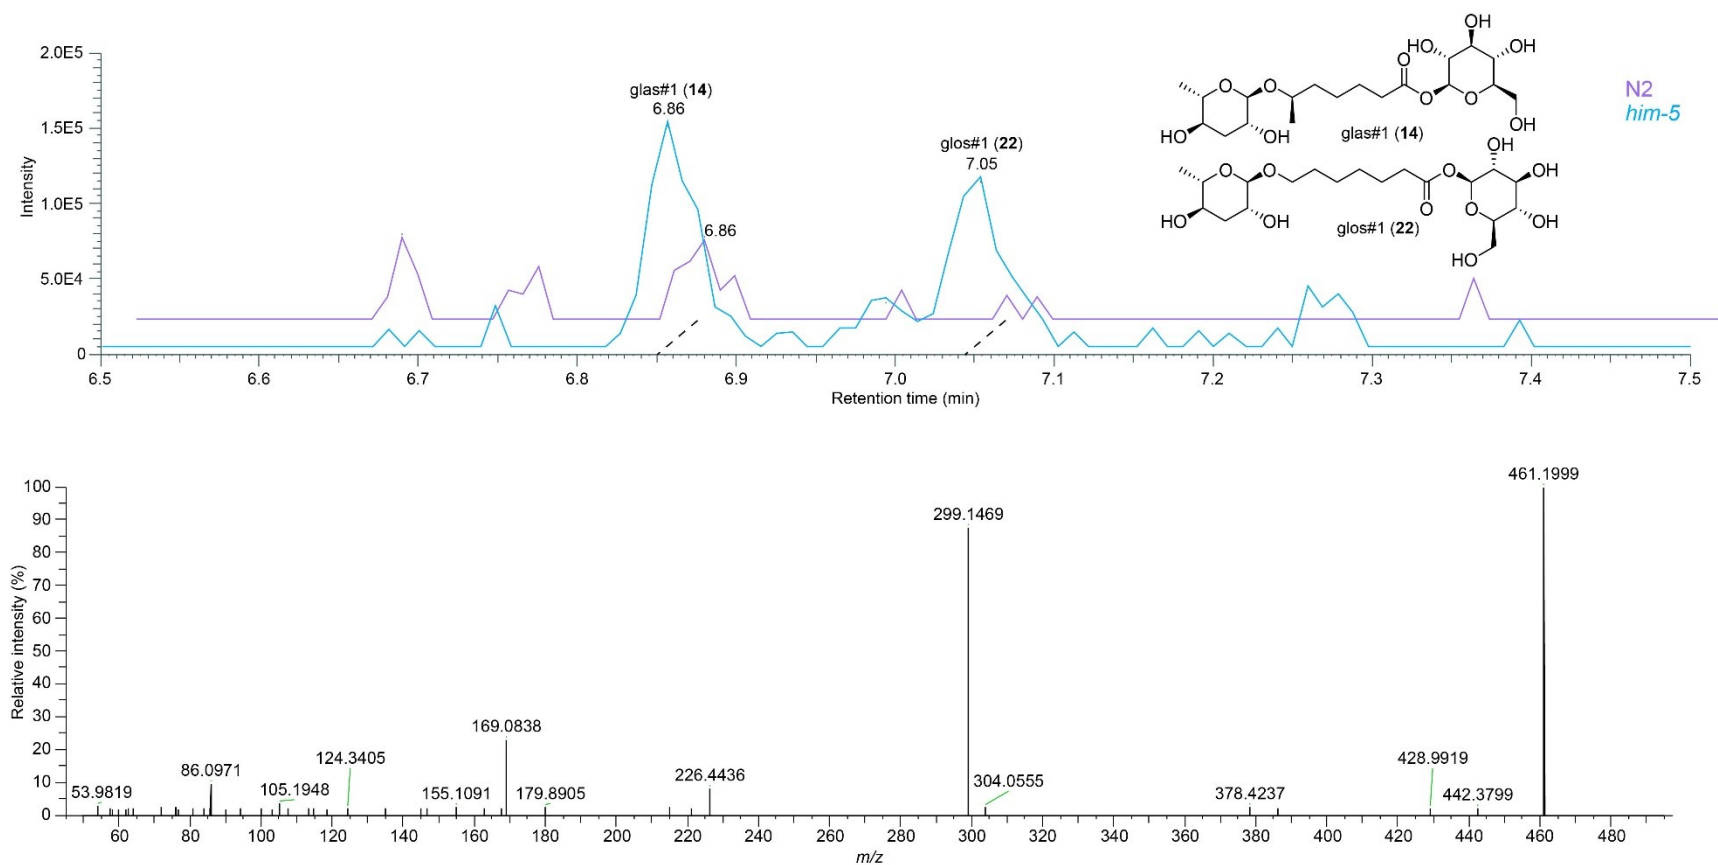

**Supplementary Figure 12. EICs and MS2 spectrum of glas#1 (14) and glos#1 (22).** EIC (ESI+) of  $m/z$  461.1995 in WT and *him-5* endo-metabolome samples showing peaks for glas#1 and glos#1, and MS2 spectrum (ESI+) for glas#1 acquired from a *him-5* endo-metabolome sample.

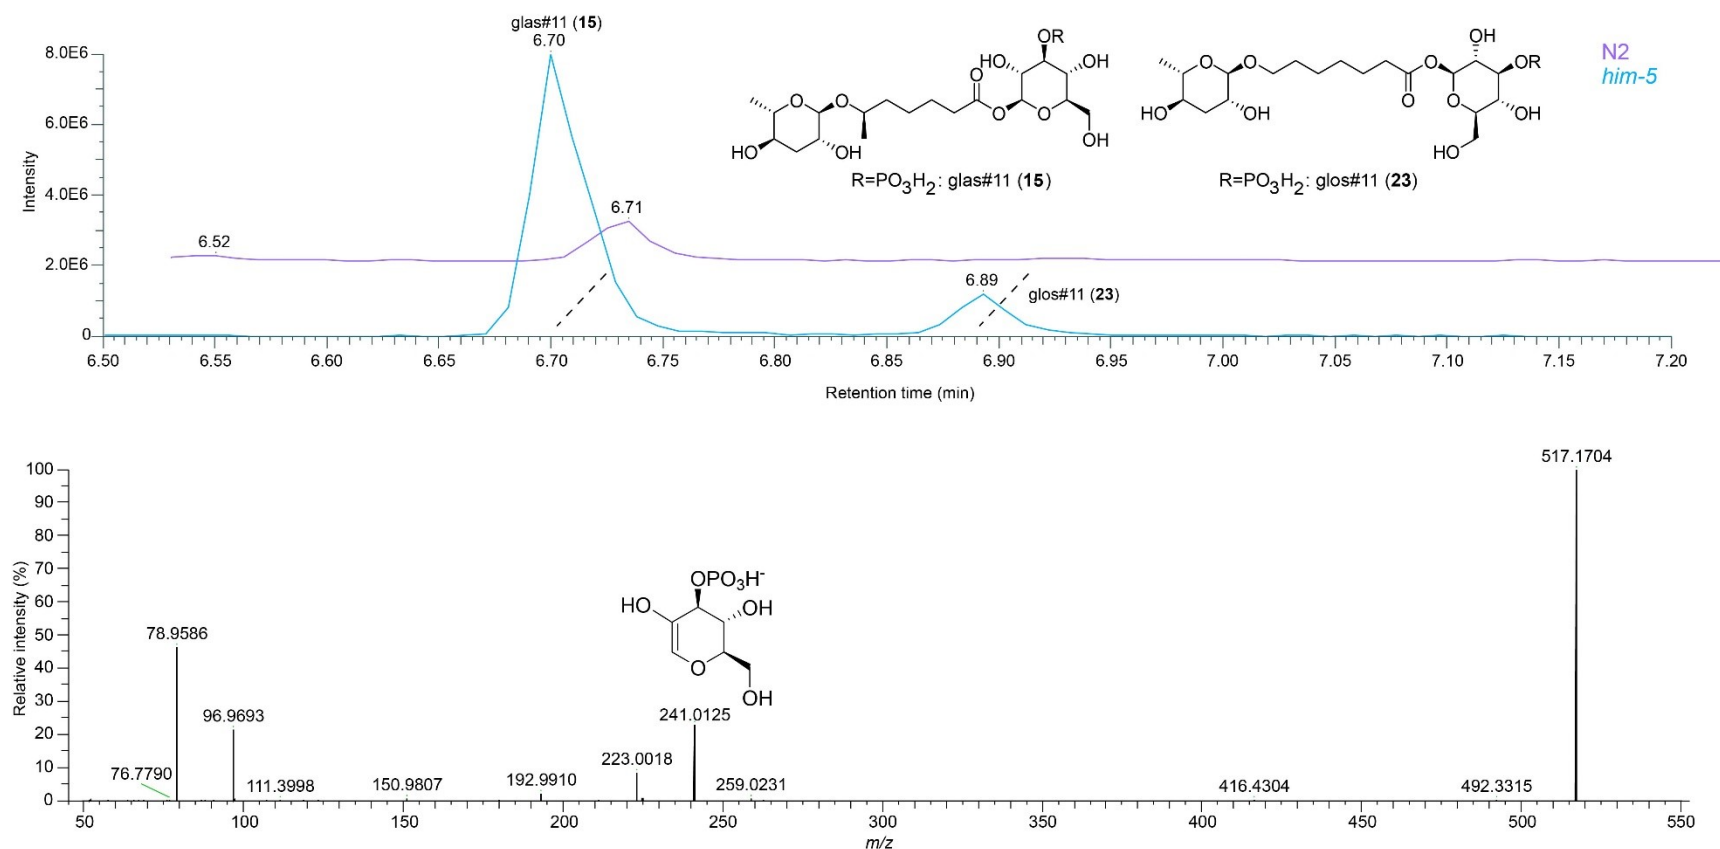

**Supplementary Figure 13. EICs and MS2 spectrum of glas#11 (15) and glos#11 (23).** EIC (ESI-) of  $m/z$  517.1669 in WT and *him-5* exo-metabolome samples showing peaks for glas#11 and glos#11 and MS2 spectrum (ESI-) for glas#11 acquired from a *him-5* exo-metabolome sample. A key fragment suggesting phosphorylation on the glucose moiety is shown for  $m/z$  = 241.0125.

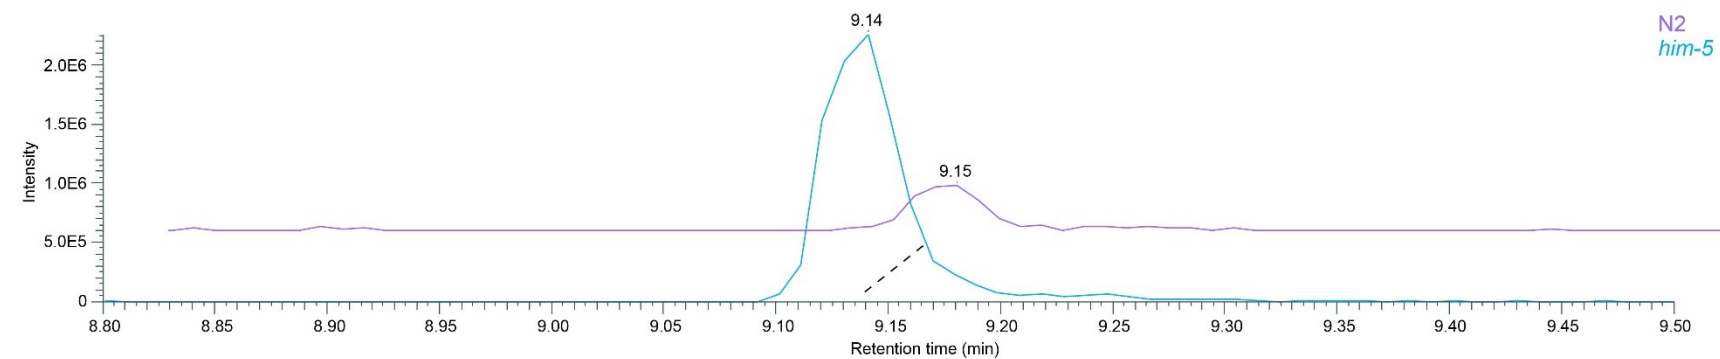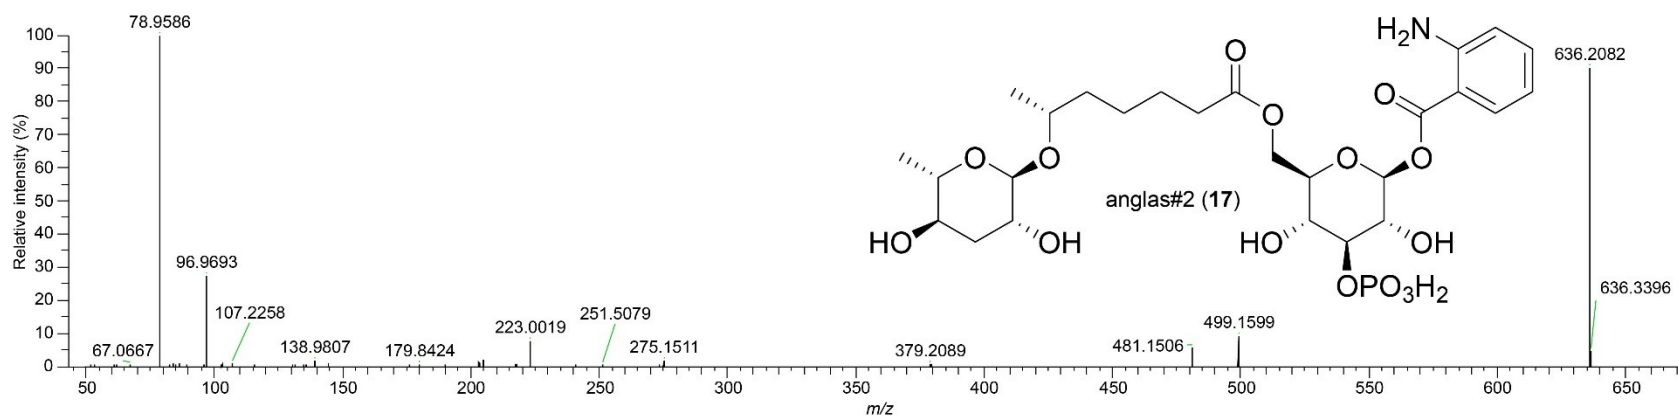

**Supplementary Figure 14. EICs and MS2 spectrum of anglas#2 (17).** EIC (ESI-) of  $m/z$  636.2070 in WT and *him-5* endo-metabolome samples showing peaks for anglas#2 and MS2 spectrum (ESI-) for anglas#2 acquired from a *him-5* endo-metabolome sample.

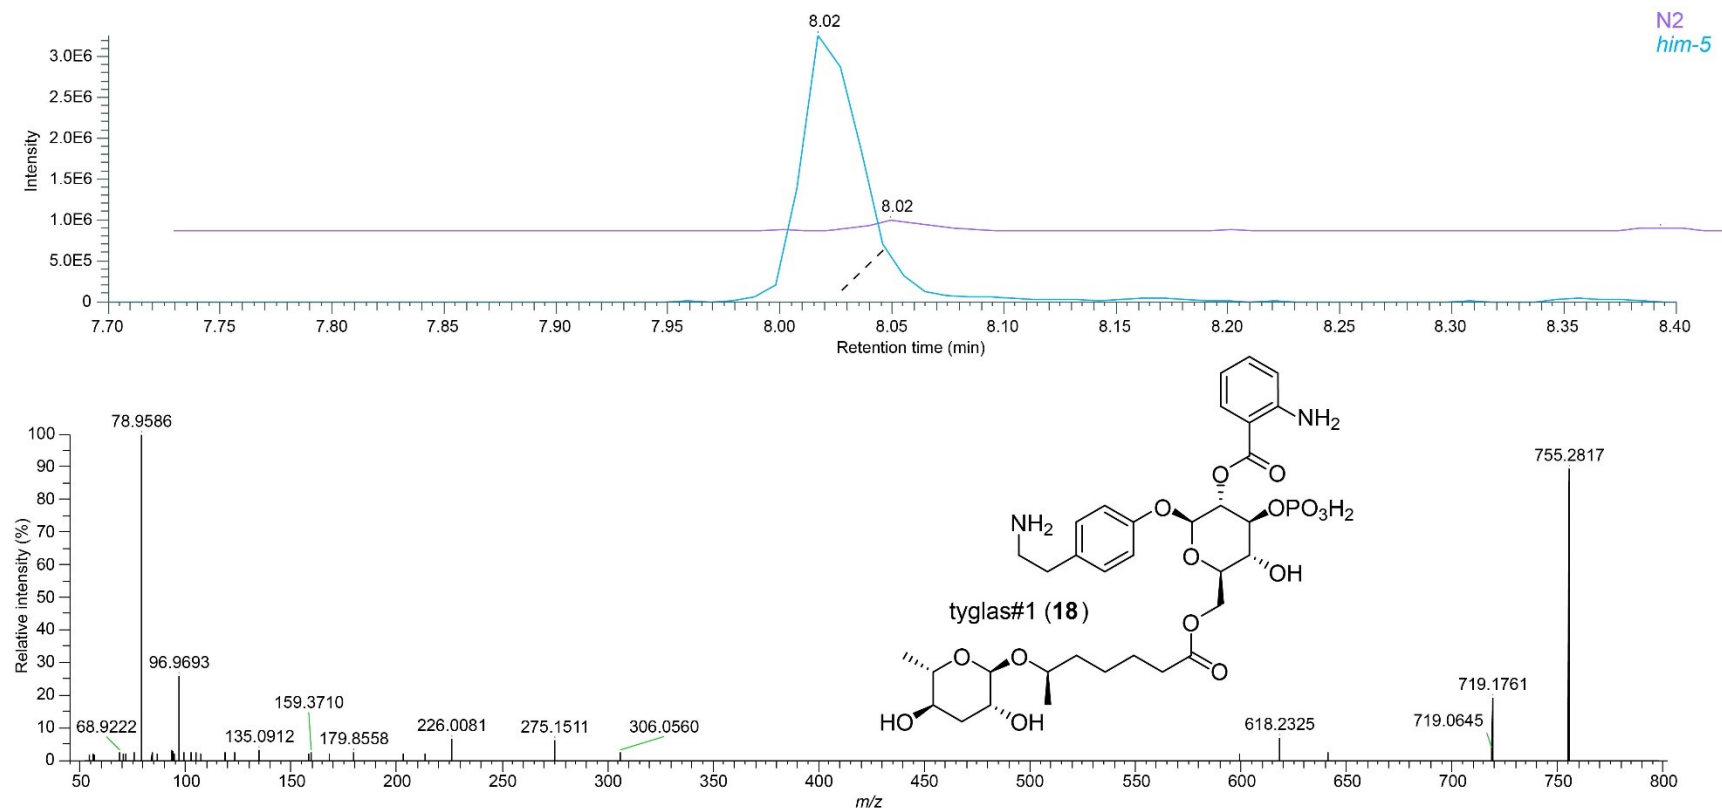

**Supplementary Figure 15. EICs and MS2 spectrum of tyglas#1 (18).** EIC (ESI-) of  $m/z$  755.2807 in WT and *him-5* endo-metabolome samples showing peaks for tyglas#1 and MS2 spectrum (ESI-) for tyglas#1 acquired from a *him-5* endo-metabolome sample See reference for ESI+ MS2 spectrum<sup>11</sup>.

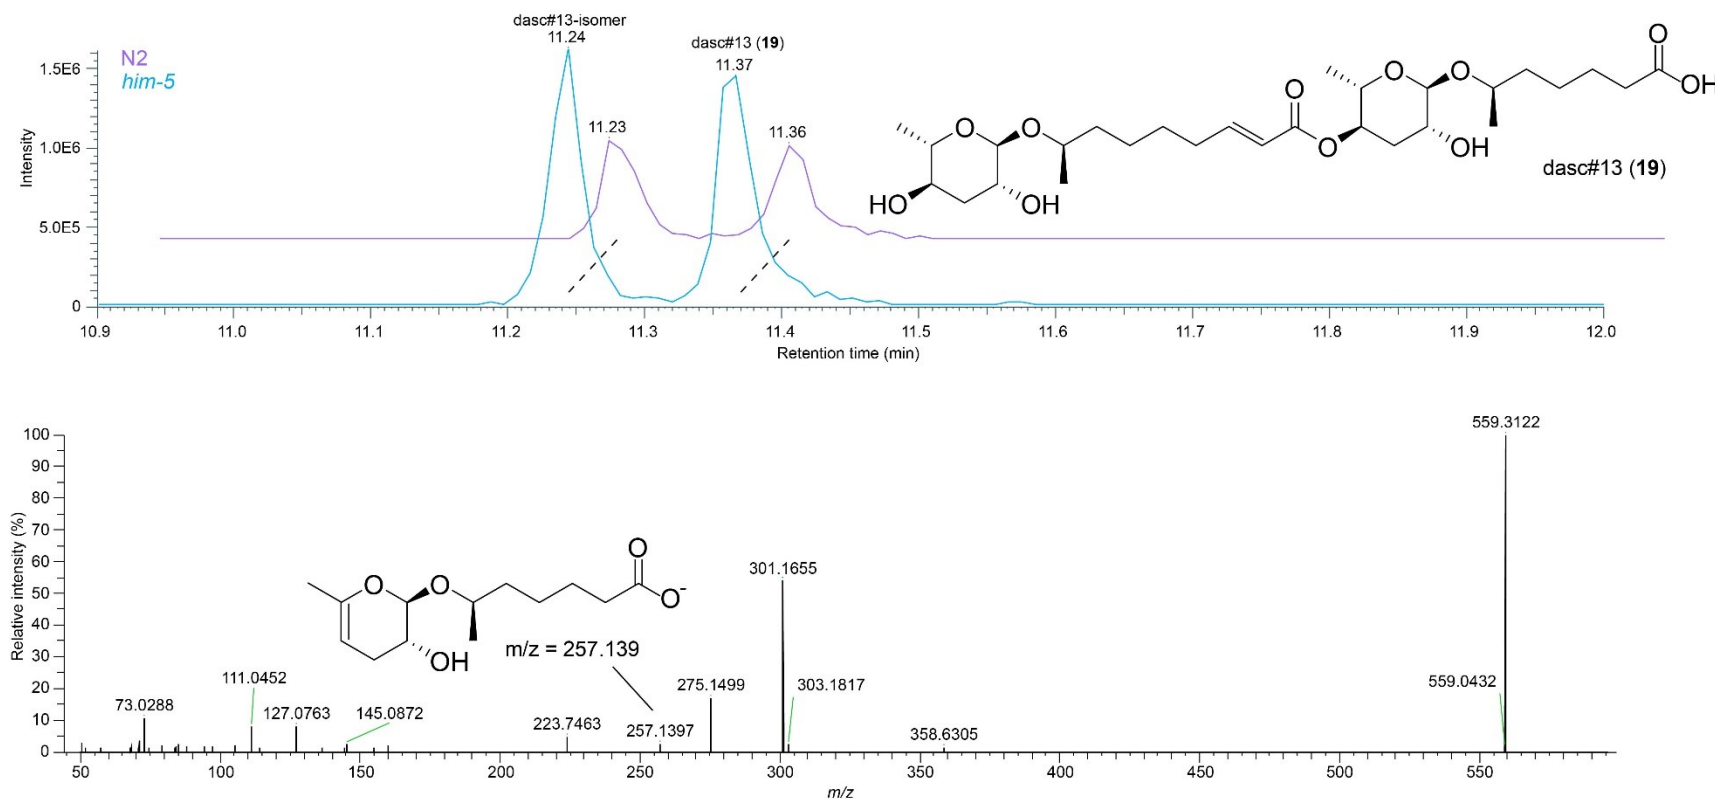

**Supplementary Figure 16. EICs and MS2 spectrum of dasc#13 (19).** EIC (ESI-) of  $m/z$  559.3129 in WT and *him-5* exo-metabolome samples showing peaks for dasc#13 (11.37 min) and MS2 spectrum (ESI-) for dasc#13 (19) acquired from a *him-5* exo-metabolome sample. The earlier eluting isomer (11.2 min) is a dasc#13 structural isomer via MS2 analysis. Key fragment ( $m/z$  = 257.1397) is displayed, suggesting the loss of ascr#3 via elimination at either the 2' or 4'-position (displayed as 4').

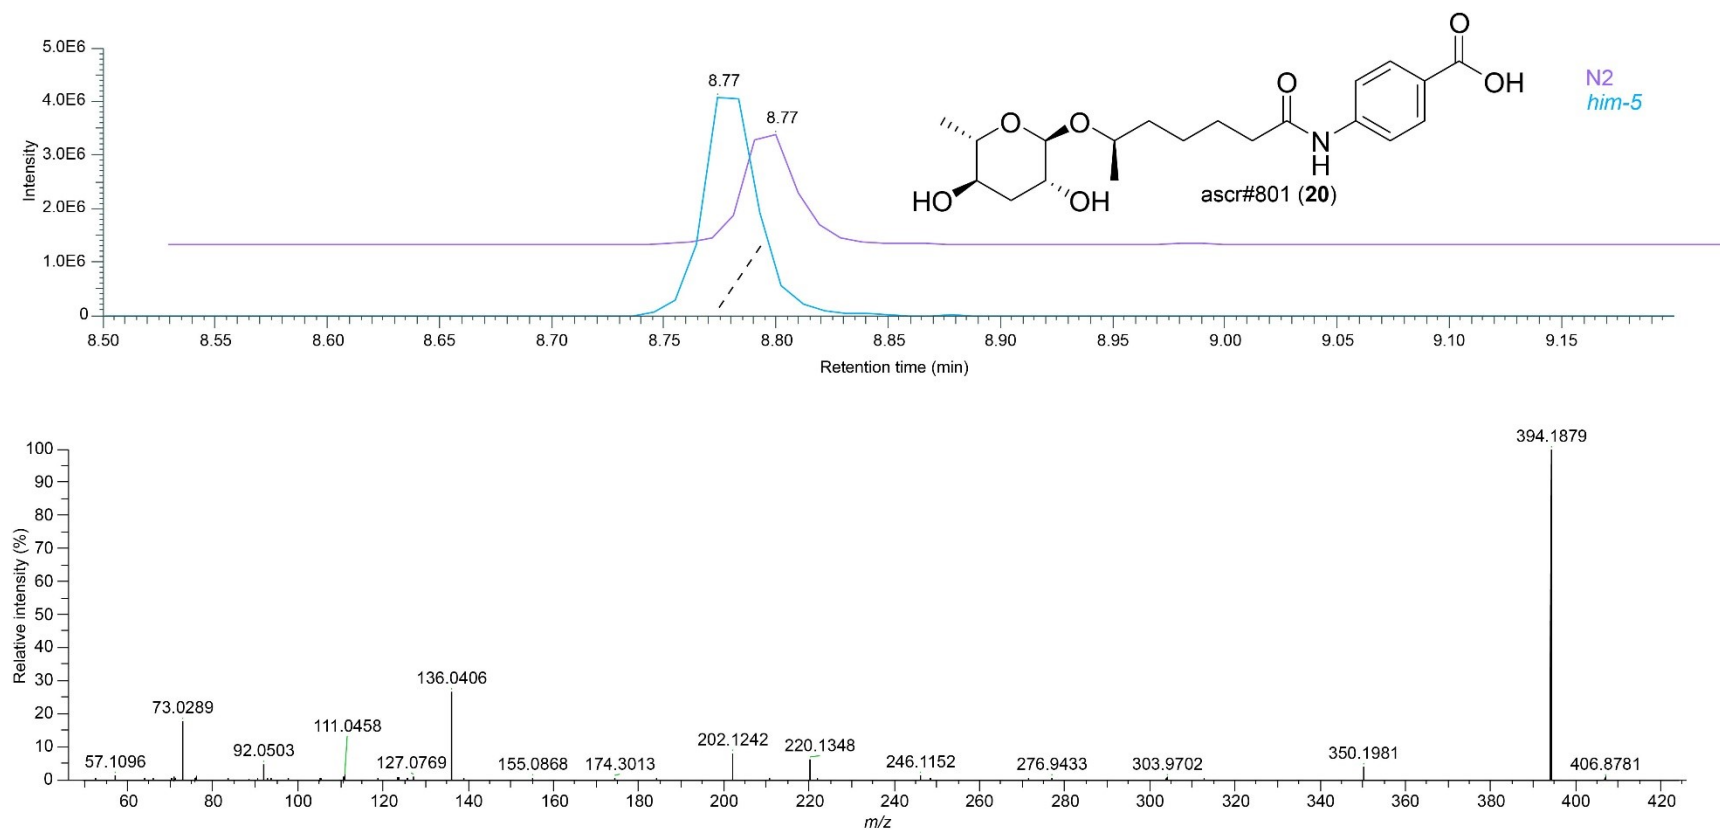

**Supplementary Figure 17. EICs and MS2 spectrum of ascr#801 (20).** EIC (ESI-) of  $m/z$  394.1875 in WT and *him-5* exo-metabolome samples showing peaks for ascr#801 and MS2 spectrum (ESI-) for ascr#801 acquired from a *him-5* exo-metabolome sample.

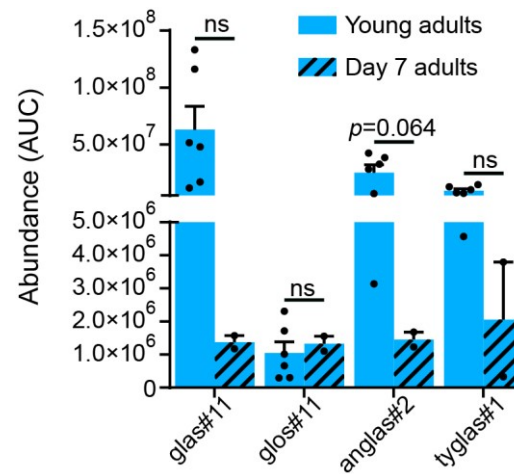

**Supplementary Figure 18. Male-enriched metabolites in older hermaphrodites.** Abundances of *him-5*-enriched *ascr#1* derivatives trended lower in *endo*-metabolome samples from day-7 hermaphrodite adults compared to young hermaphrodite adults, approaching significance in the case of *anglas#2*. Bars represent mean  $\pm$  s.e.m. with six (young adults) or two (day 7 adults) independent biological replicates; *p* values were calculated by two-sided Welch *t*-tests with Holm-Šídák correction; ns, not significant. Source data are provided as a Source Data file.

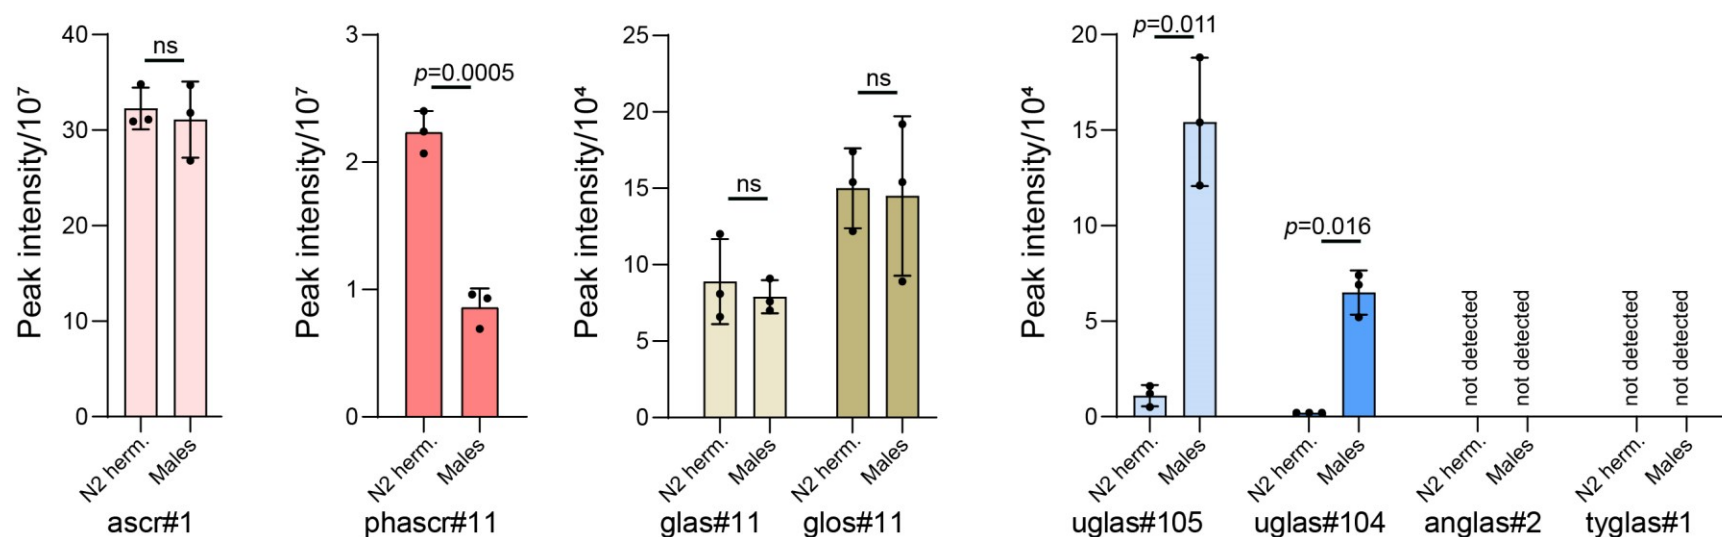

**Supplementary Figure 19. Male-enriched metabolites in hand-picked *C. elegans* samples.** ascr#1 derivatives are not enriched (ascr#1, phascr#11, glas#11, glos#11) or not detected (anglas#2, tyglas#1) in *endo*-metabolome samples of hand-picked, pure males compared to pure hermaphrodites. In contrast, uglas#104 and uglas#105 are enriched in *endo*-metabolome samples of hand-picked, pure males compared to pure hermaphrodites. Bars represent mean ± s.e.m. with three independent biological replicates; *p* values were calculated by two-sided Welch *t*-tests; ns, not significant. Source data are provided as a Source Data file.



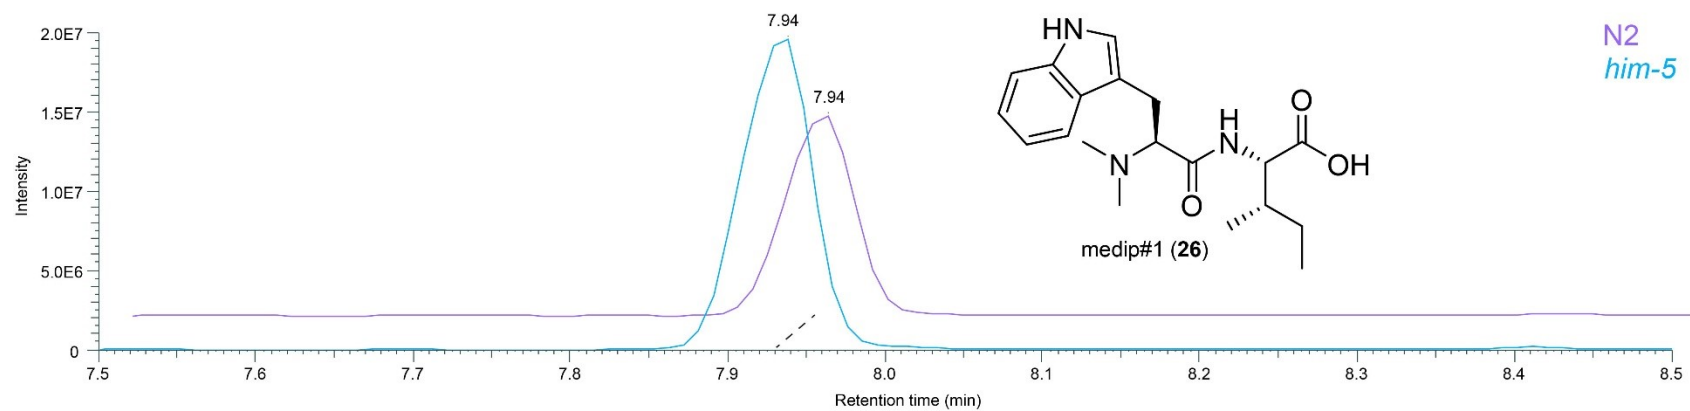

**Supplementary Figure 20. Detection of medip#1 in exo-metabolome samples.** EICs (ESI+) of  $m/z$  346.2125 in WT and *him-5* exo-metabolome samples showing peaks for medip#1.

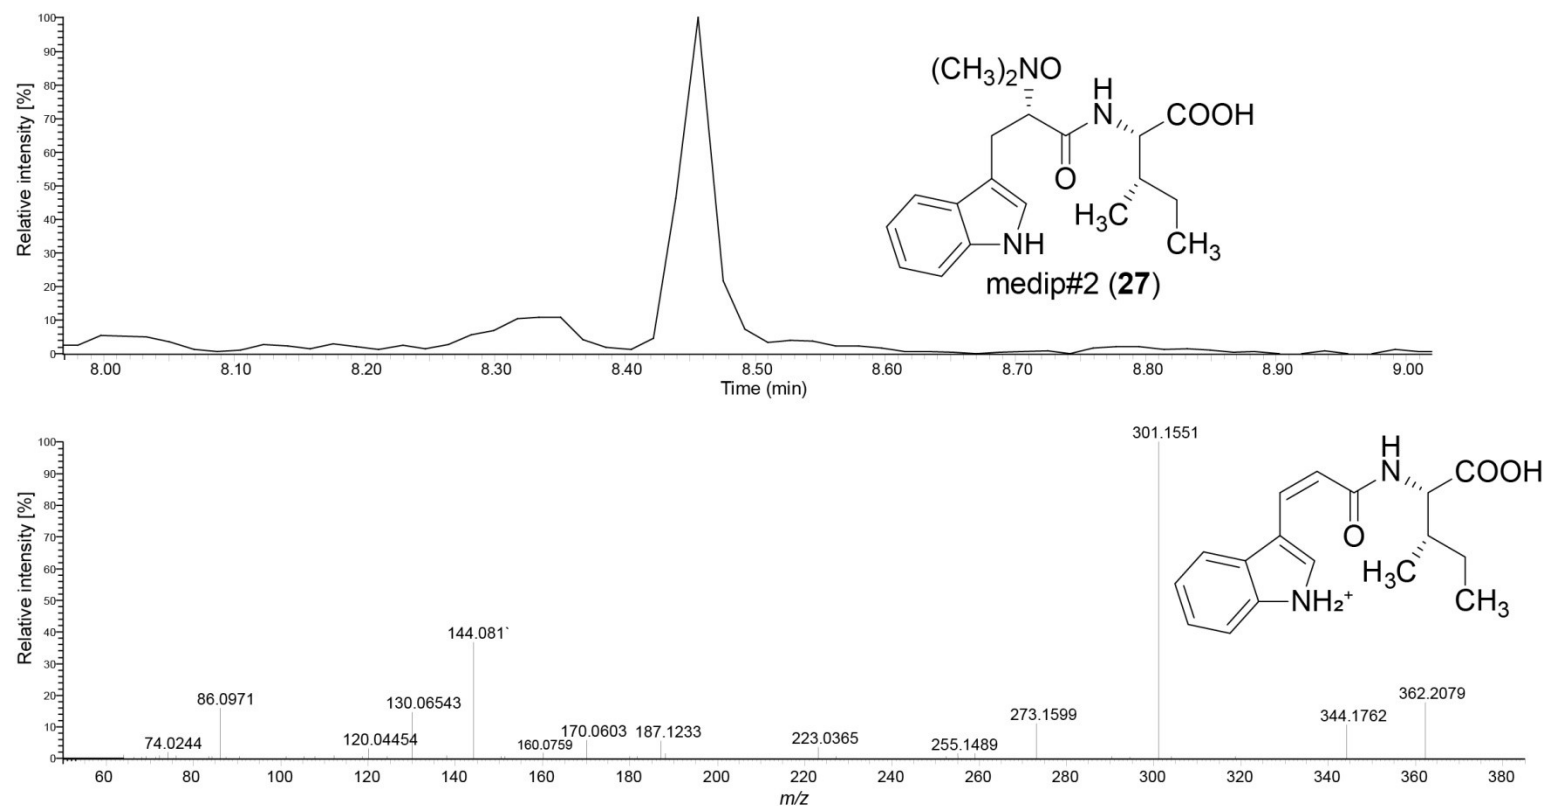

**Supplementary Figure 21. EIC and MS2 spectrum of medip#2 (27).** EIC (ESI+) of  $m/z$  362.2074 in WT and *him-5* exo-metabolome samples showing a peak for medip#2 (top), and MS2 spectrum (ESI+) for medip#2 acquired from a *him-5* exo-metabolome sample showing key fragment at  $m/z$  301.1551.

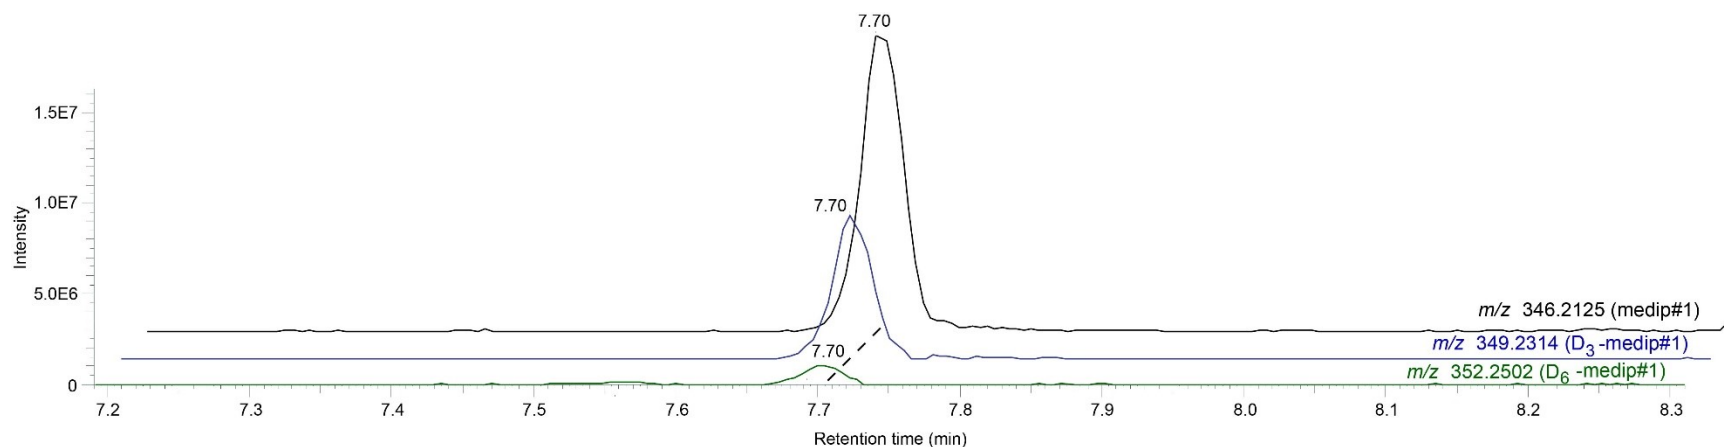

**Supplementary Figure 22. D<sub>3</sub>-Methionine labeling of medip#1.** EICs (ESI+) for medip#1 (black), D<sub>3</sub>-medip#1 (blue), D<sub>6</sub>-medip#1 (green) in the exo-metabolome of *him-5* animals fed D<sub>3</sub>-methionine.

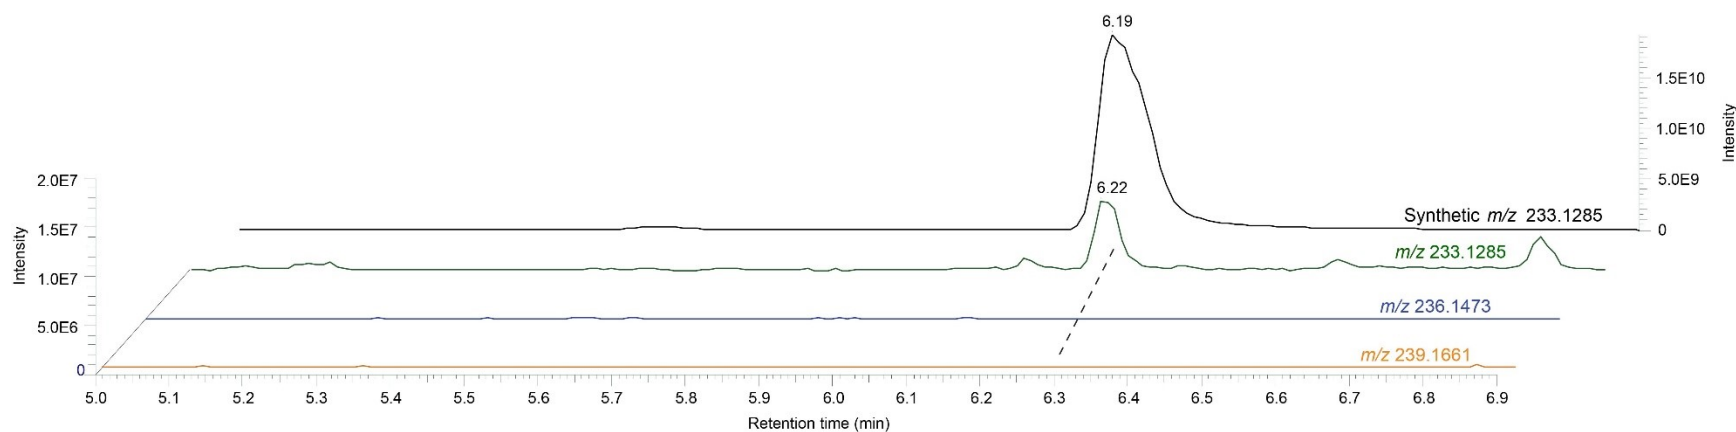

**Supplementary Figure 23. D<sub>3</sub>-Methionine feeding does not label dimethyltryptophan.** EICs (ESI+) of synthetic dimethyltryptophan (black), unlabeled dimethyltryptophan in the *him-5* exo-metabolome (green), the trace for the *m/z* of D<sub>3</sub>-dimethyltryptophan, lacking a co-eluting peak (blue), and the trace for the *m/z* of D<sub>6</sub>-dimethyltryptophan (orange), also lacking a co-eluting peak.

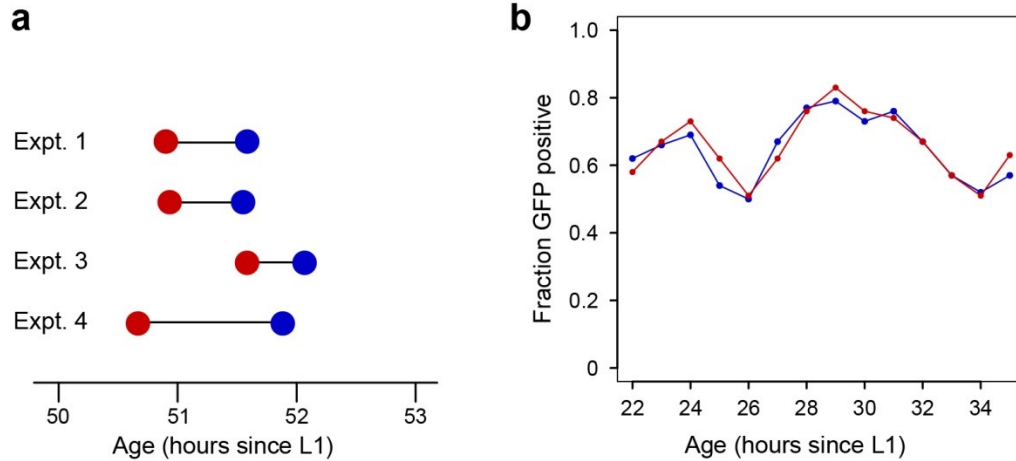

**Supplementary Figure 24. Developmental assays with medip#1.** **a.** Time to sexual maturation of hermaphrodites raised on medip#1-conditioned plates (red) vs. paired control (blue). Median time of morphologically-defined adulthood is shown for four independent experiments. In Experiments 1, 3, and 4, medip#1 was at 2 nM, while in Experiment 2, it was at 200 nM. In all experiments,  $n = 23-25$  for each condition. **b.** Larval development during L1-L3 stages does not show acceleration on medip#1. Fractions of GFP-positive *mlt-10::GFP* hermaphrodites raised on 2 nM medip#1 (red) or control (blue). At none of the points was there a significant difference between the two curves (Binomial test with the Bonferroni correction).  $n = 342$  for control animals and 336 medip#1 animals. Six biologically independent plates each for control and medip#1 were monitored every hour. Each reported data point is the average fraction of GFP positive animals across the six plates. In all experiments in **a** and **b**, it was not known to the investigator which plates were medip#1-conditioned and which were control. Source data are provided as a Source Data file.

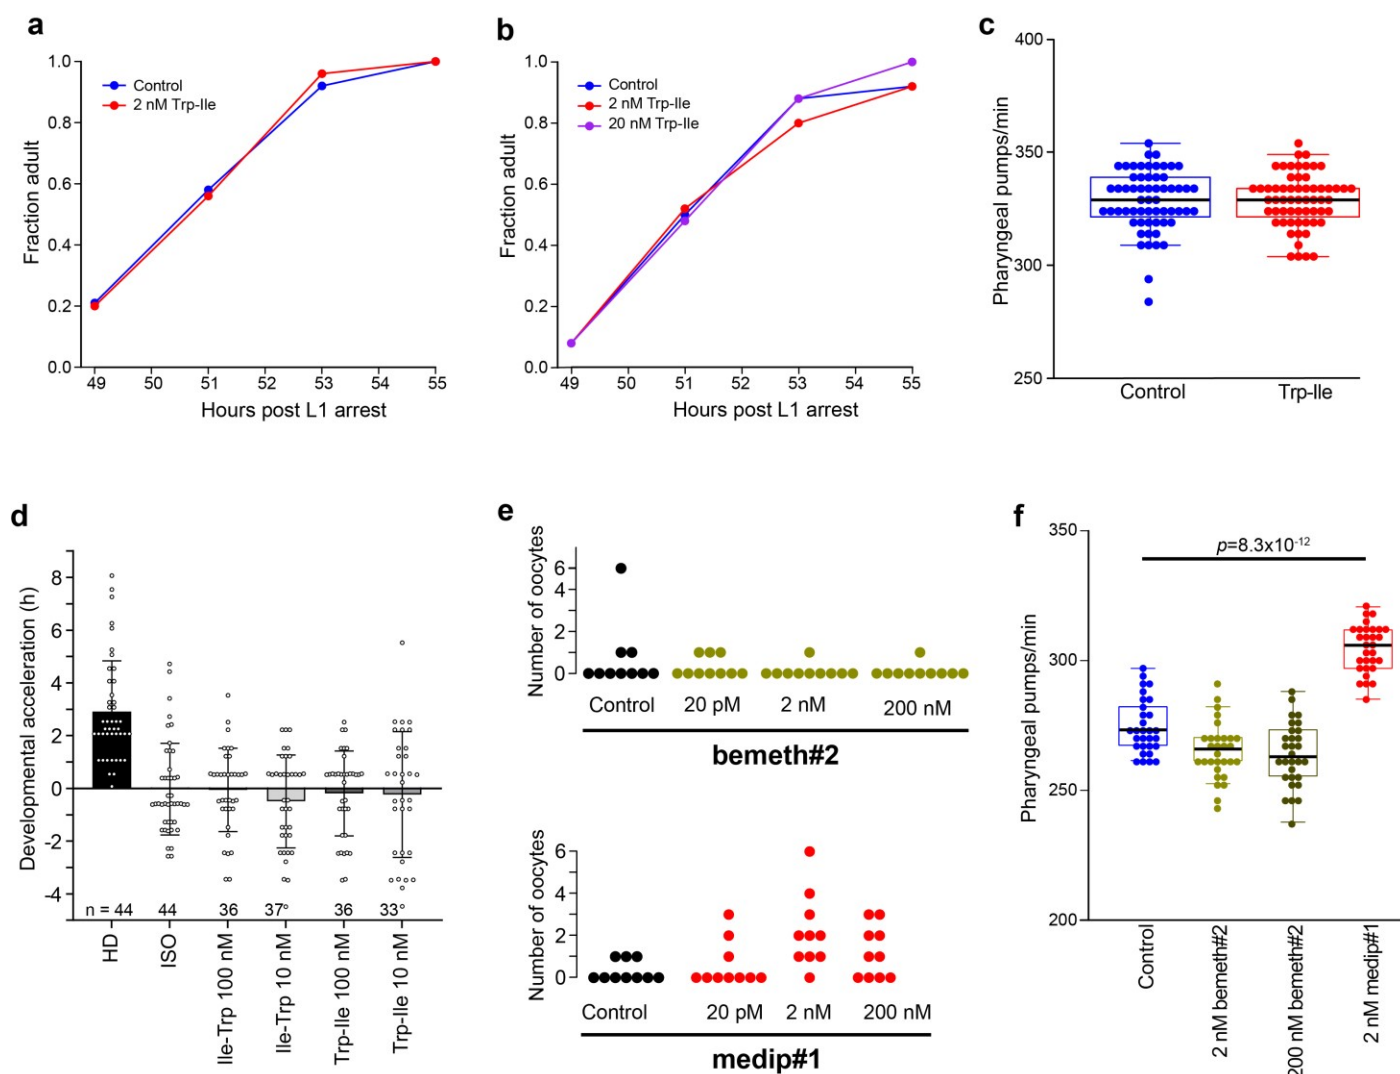

**Supplementary Figure 25. medip#1-related dipeptides and bemeth#2 do not accelerate development or increase pharyngeal pumping.** **a.** No acceleration of larval development was observed on 2 nM of the Trp-Ile dipeptide (red) compared to control (blue). Data are from one experiment with  $n = 24$  animals for control,  $n = 25$  for 2 nM Trp-Ile. **b.** No acceleration of larval development was observed on 2 nM (red) or 20 nM (purple) of the Trp-Ile dipeptide compared to control (blue). Data are from one experimental replicate with  $n = 24$  for control,  $n = 25$  for each of the two concentrations of Trp-Ile. The 2 nM experiment in this panel is an independent replicate of the experiment shown in panel a. **c.** The frequency of pharyngeal pumping was not increased on 2 nM of the Trp-Ile dipeptide (red) compared to control (blue). Data are from one experiment with  $n = 60$  animals for each condition. Boxes represent the two inner quartiles, horizontal lines represent medians, whiskers extend to 1.5X of the box data. **d.** Time point of first egg laying of isolated worms on different concentrations of Trp-Ile and Ile-Trp compared to untreated isolated worms (ISO, control) and grouped worms (high density, HD). Bars represent mean  $\pm$  s.e.m. Data are from four independent biological replicates, with the total number of animals indicated above the x-axis. **e.** No acceleration of larval development was observed at any of the three shown concentrations of bemeth#2

(green) compared to control (black). In contrast, at two higher concentrations (2 nM and 200 nM) of medip#1 (red) we did observe acceleration compared to control (black), as described in the main text. For each condition, data are from one experiment with  $n = 10$  animals. **f.** The frequency of pharyngeal pumping was not increased on either of the two tested concentrations of bemeth#2 (green) compared to control (blue). For comparison, on 2 nM of medip#1 (red) there was significant increase in the frequency of pharyngeal pumping (medip#1 data are from Figure 4k). For each condition, data are from one experiment with  $n = 30$  animals. Boxes represent the two inner quartiles, horizontal lines represent medians, whiskers extend to 1.5X of the box data. In **c**, **e**, **f**, each circle represents a single tested animal;  $p$  value was calculated by Kolmogorov-Smirnov test. Source data are provided as a Source Data file.

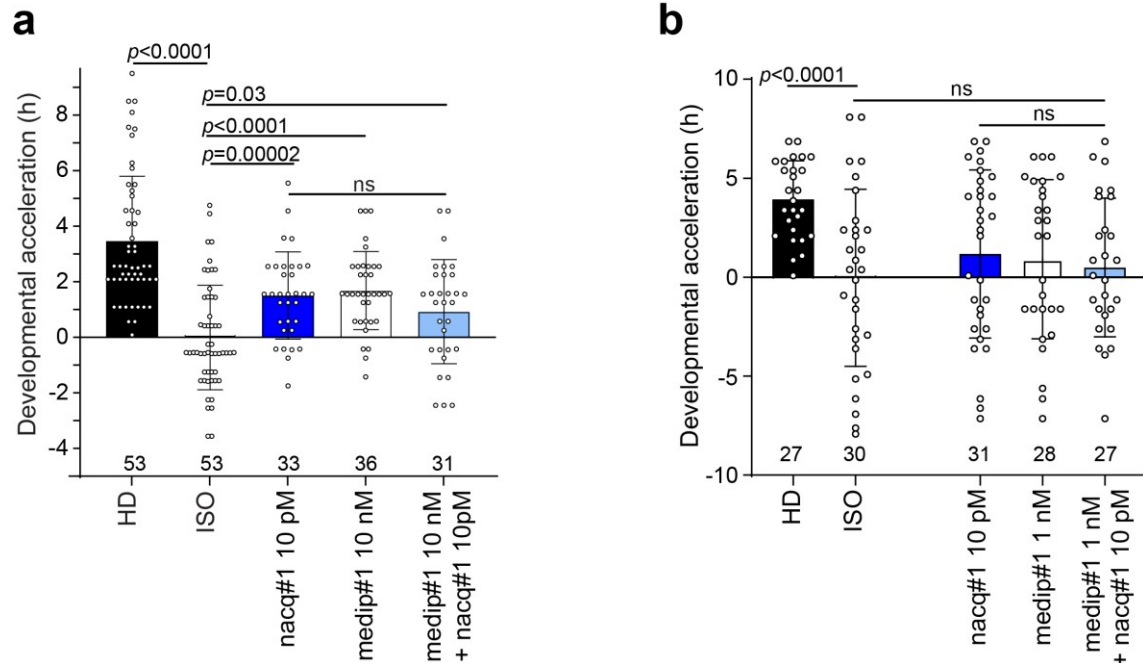

**Supplementary Figure 26. Developmental acceleration of a mixture of medip#1 and nacq#1. a, b,** Time point of first egg laying of isolated worms on the indicated concentrations of medip#1, nacq#1, or mixtures of medip#1 and nacq#1, compared to untreated isolated worms (ISO, control) and grouped worms (high density, HD). Bars represent mean  $\pm$  s.e.m. Data are from four independent biological replicates, with the total number of animals used for each condition indicated above the x-axis;  $p$  values were calculated by two-sided Welch  $t$ -tests; ns, not significant. Source data are provided as a Source Data file.

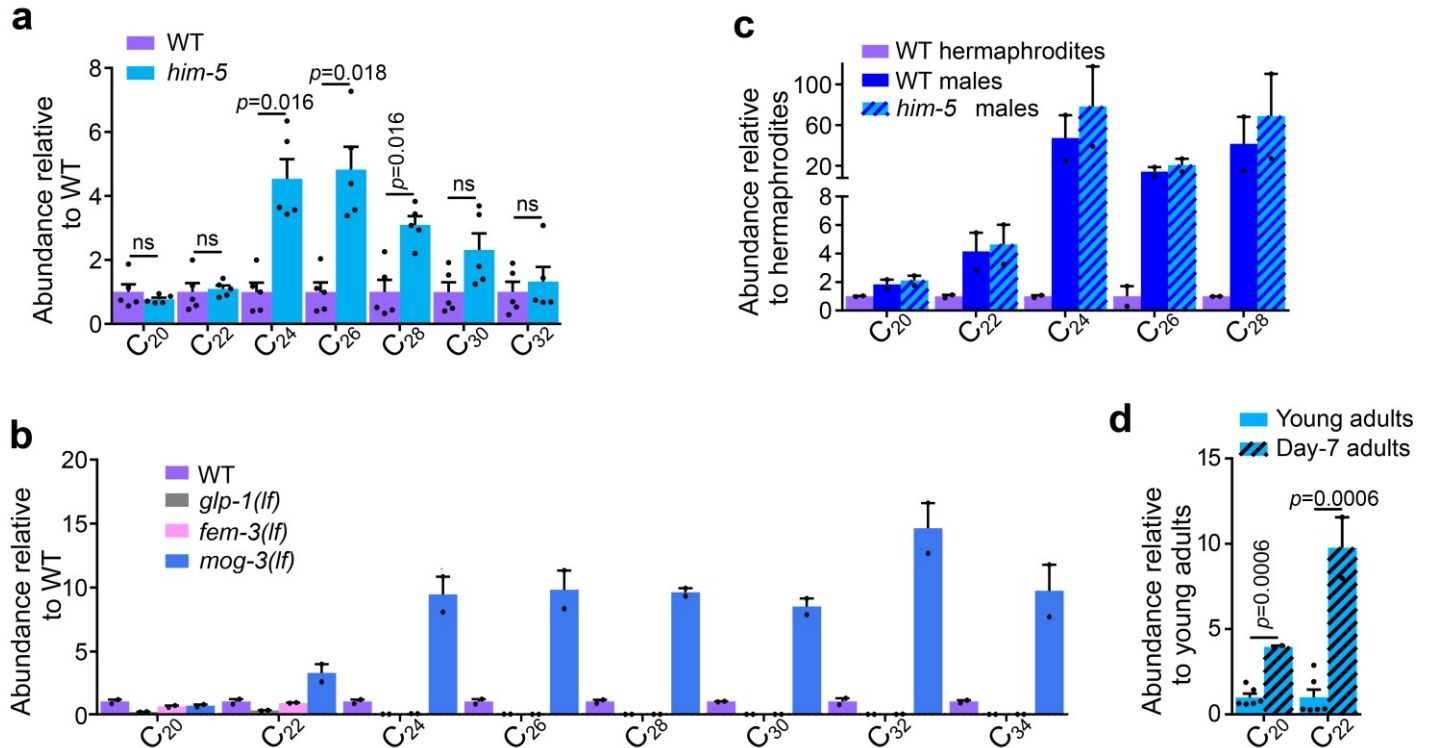

**Supplementary Figure 27. Male germline-dependent increase in polyunsaturated very long chain fatty acids (VLCPUFAs).** **a.** VLCPUFAs with 20-32 carbons were significantly enriched in *him-5* cultures. Bars represent mean  $\pm$  s.e.m. with five independent biological replicates;  $p$  values were calculated by two-sided Welch  $t$ -tests with Holm-Šídák correction; ns, not significant. **b.** VLCPUFAs with 24-32 carbons were enriched in germline-masculinized *mog-3(lf)* animals compared to WT, but absent in *glp-1(lf)* and *fem-3(lf)* animals. Note that these measurements of lipophilic fatty acids used a different set of germline mutants than the other metabolomic comparisons (*mog-3(lf)* instead of *fem-3(gf)* and *fem-3(lf)* instead of *fem-2(lf)*). Bars represent mean  $\pm$  s.e.m. with two independent biological replicates. **c.** VLCPUFAs with 20-28 carbons were highly enriched in hand-picked samples of N2 and *him-5* males. Longer-chained VLCPUFAs could not be detected due to the small size of these samples. Bars represent mean  $\pm$  s.e.m. with two independent biological replicates. **d.** Two VLCPUFAs were detected in worm bodies extracted with methanol, EPA and DPA, which were 4- and 10-fold enriched in old worms over young worms. Bars represent mean  $\pm$  s.e.m. with six (young adults) and two (day-7 adults) independent biological replicates;  $p$  values were calculated by unpaired two-sided  $t$ -tests with Holm-Šídák correction. Source data are provided as a Source Data file.



### 3. NMR Spectra

(2*O*)- and (3*O*)-acetyl-*S*-methylthioadenosine (acemta#1 4 and acemta#2 5),  $^1\text{H}$  NMR spectrum (500 MHz,  $\text{CDCl}_3$ )

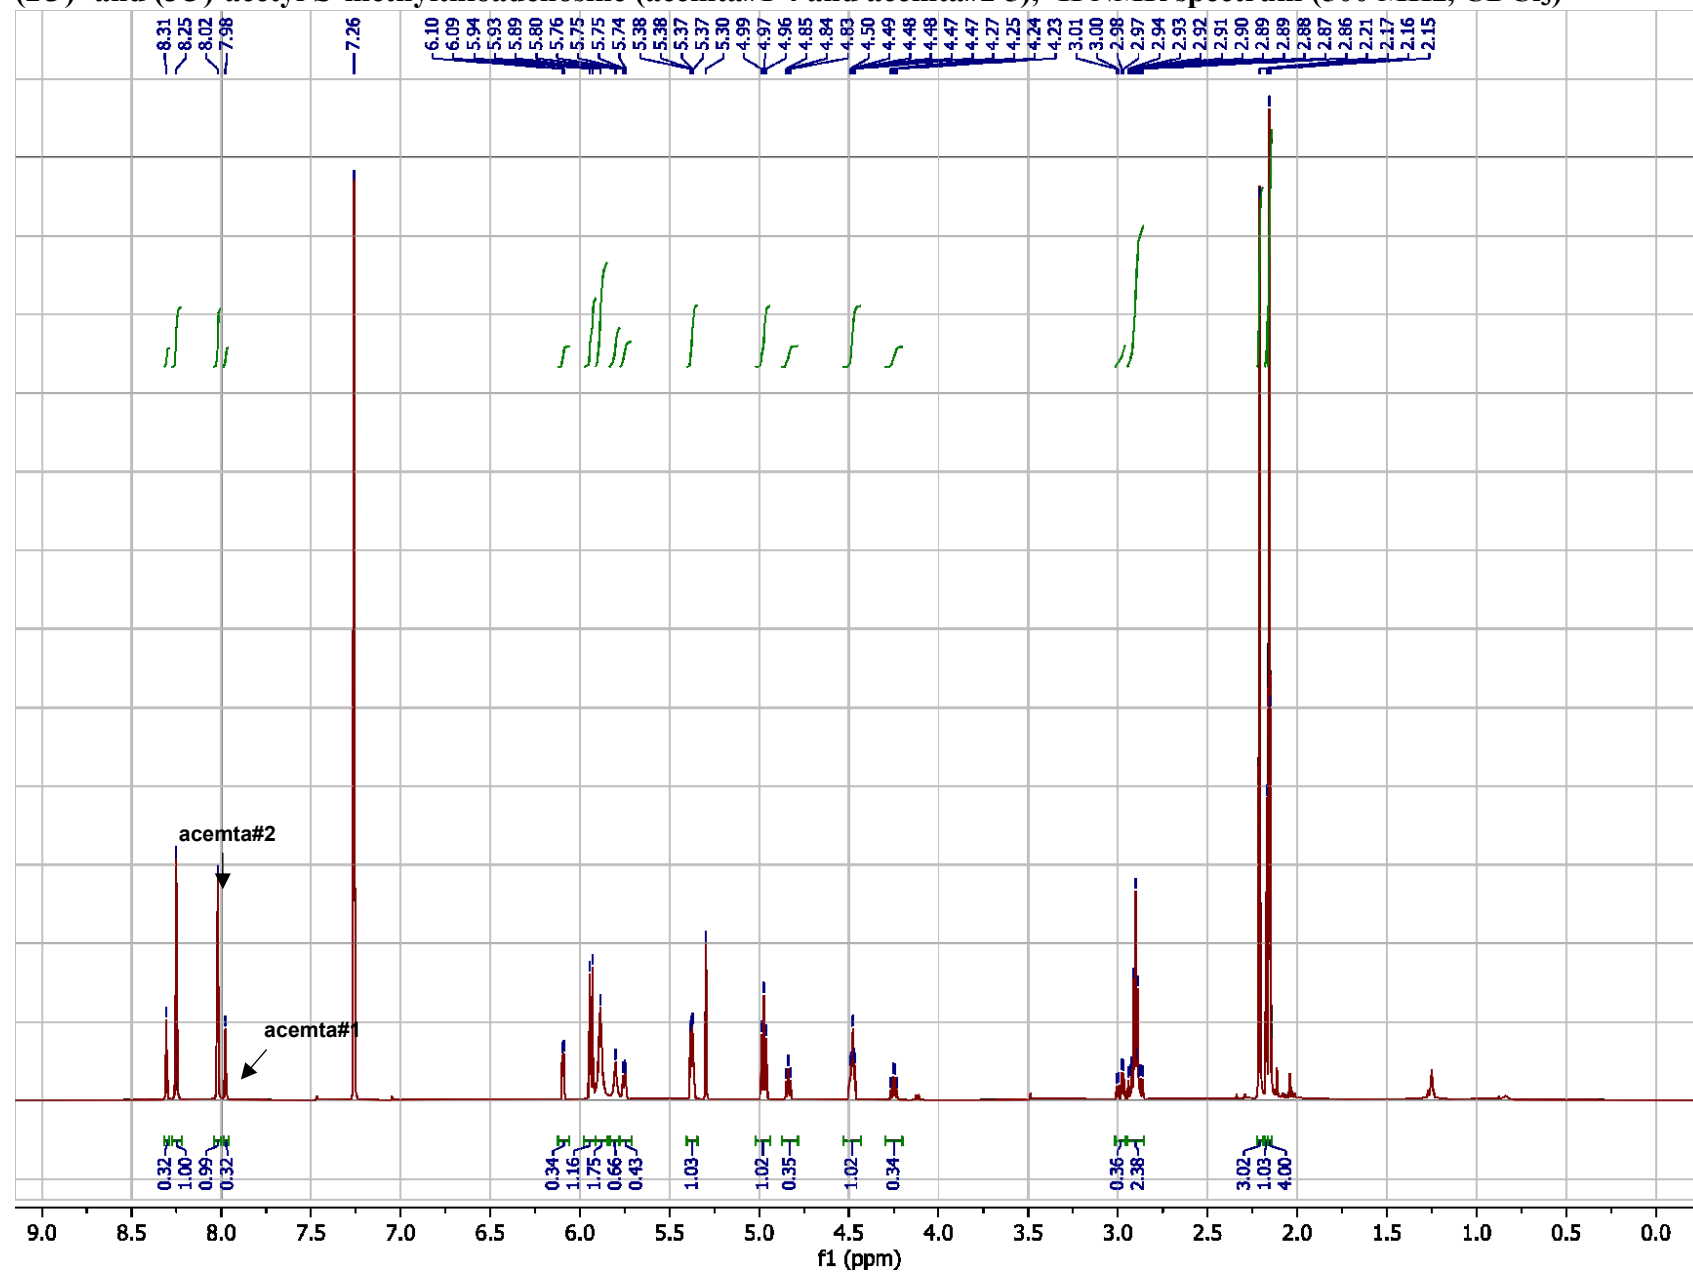

acemta#1 and acemta#2 (4 and 5),  $^{13}\text{C}$  NMR spectrum (125 MHz,  $\text{CDCl}_3$ )

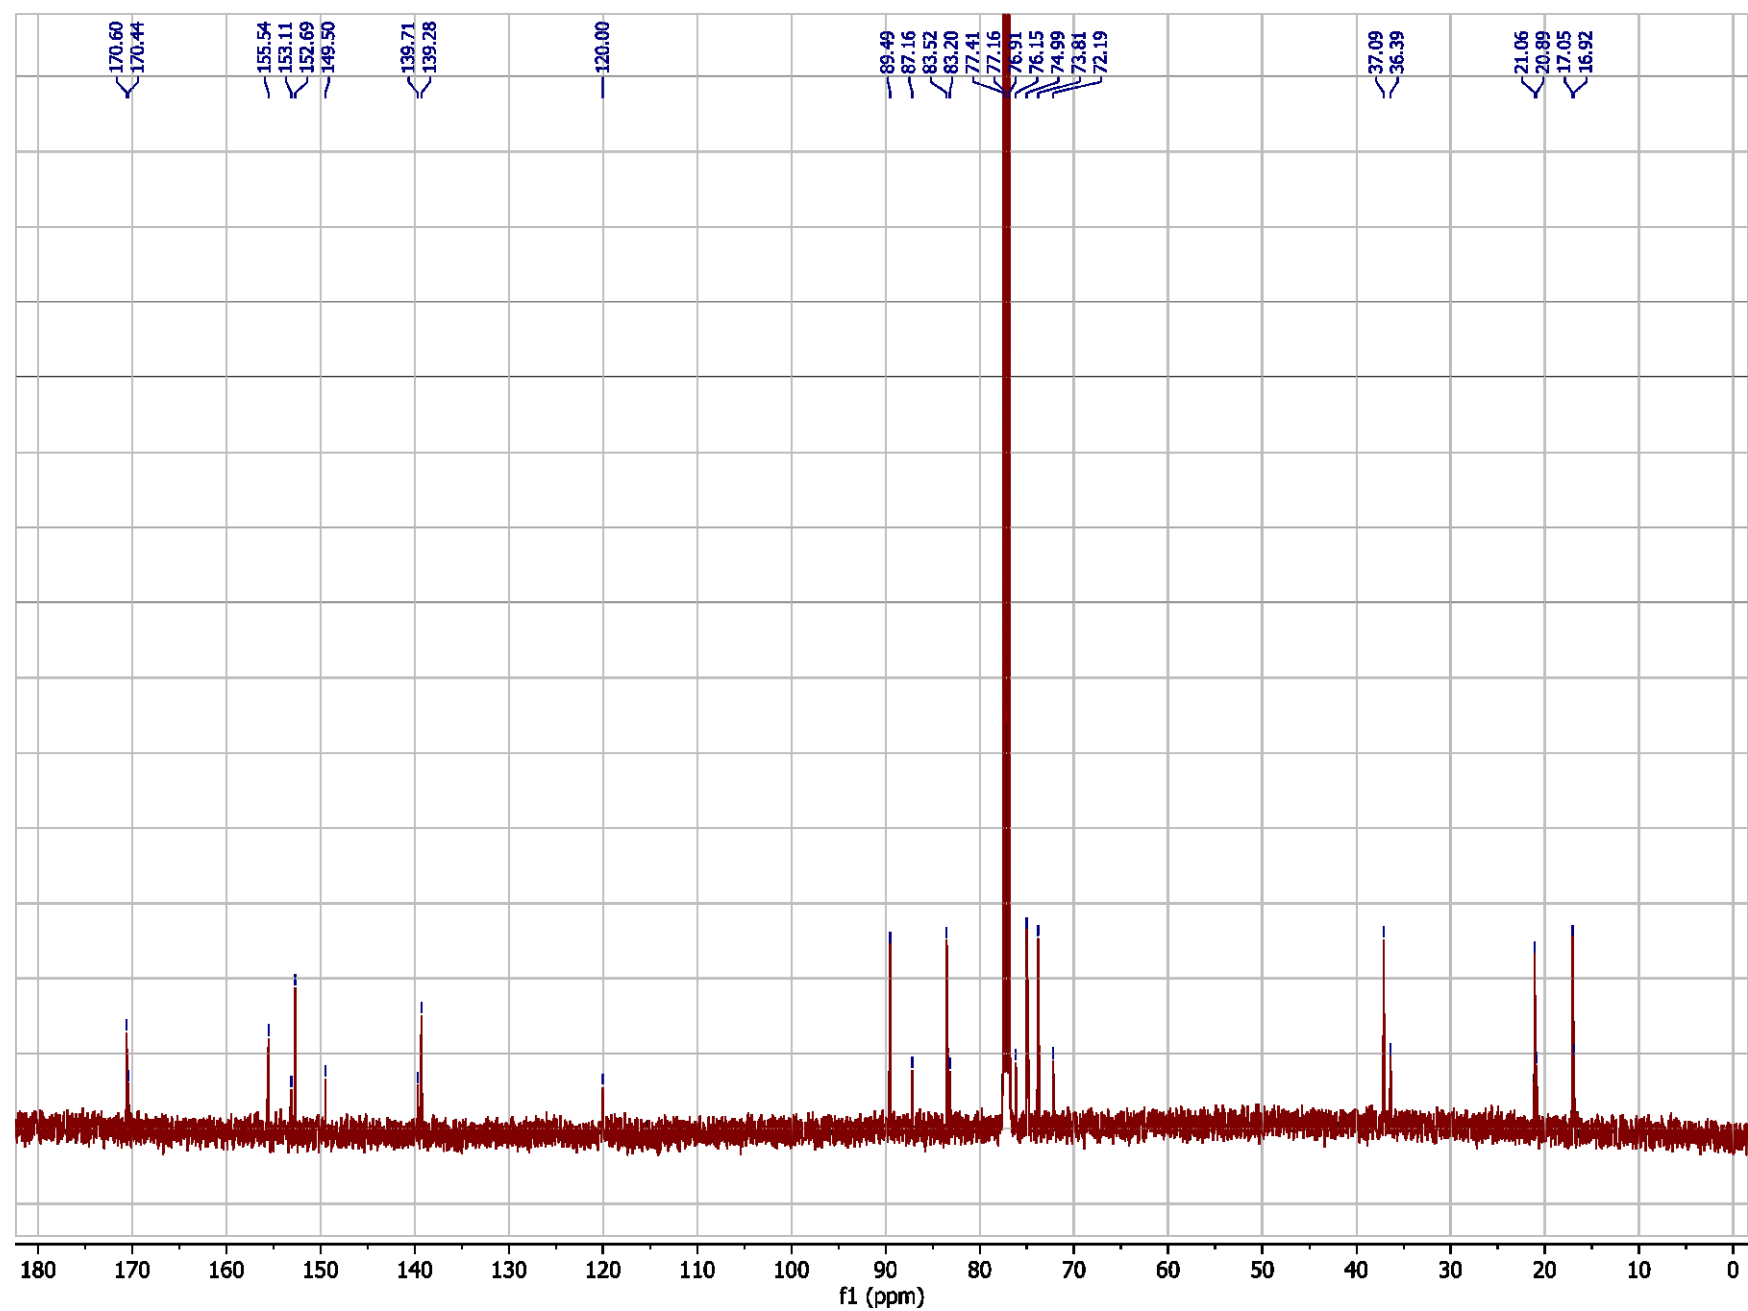

*N,N*-Dimethyltryptophan (24),  $^1\text{H}$  NMR spectrum (500 MHz,  $\text{D}_6\text{-DMSO}$ )

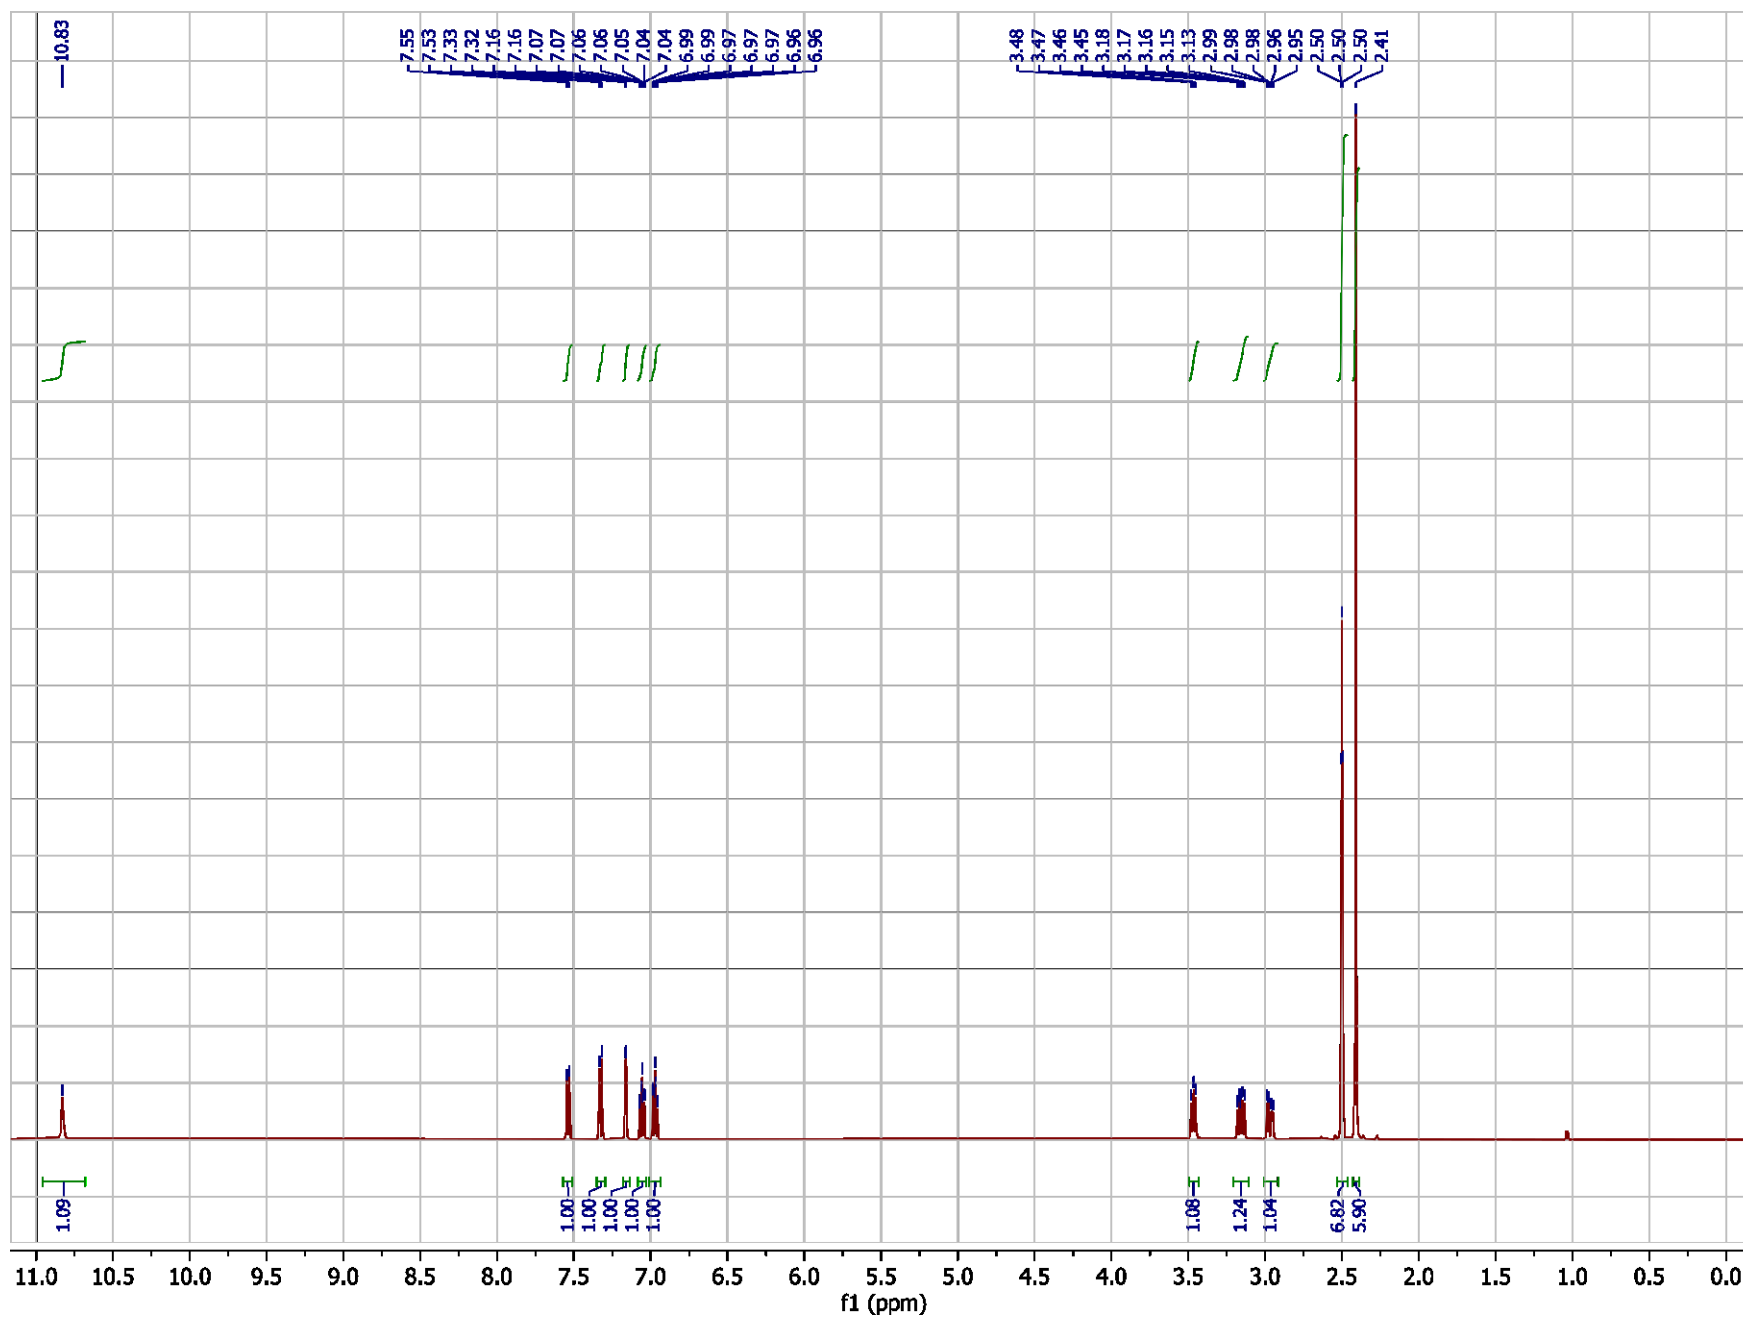

*N,N*-Dimethyltryptophan (24),  $^{13}\text{C}$  NMR spectrum (125 MHz,  $\text{D}_6$ -DMSO)

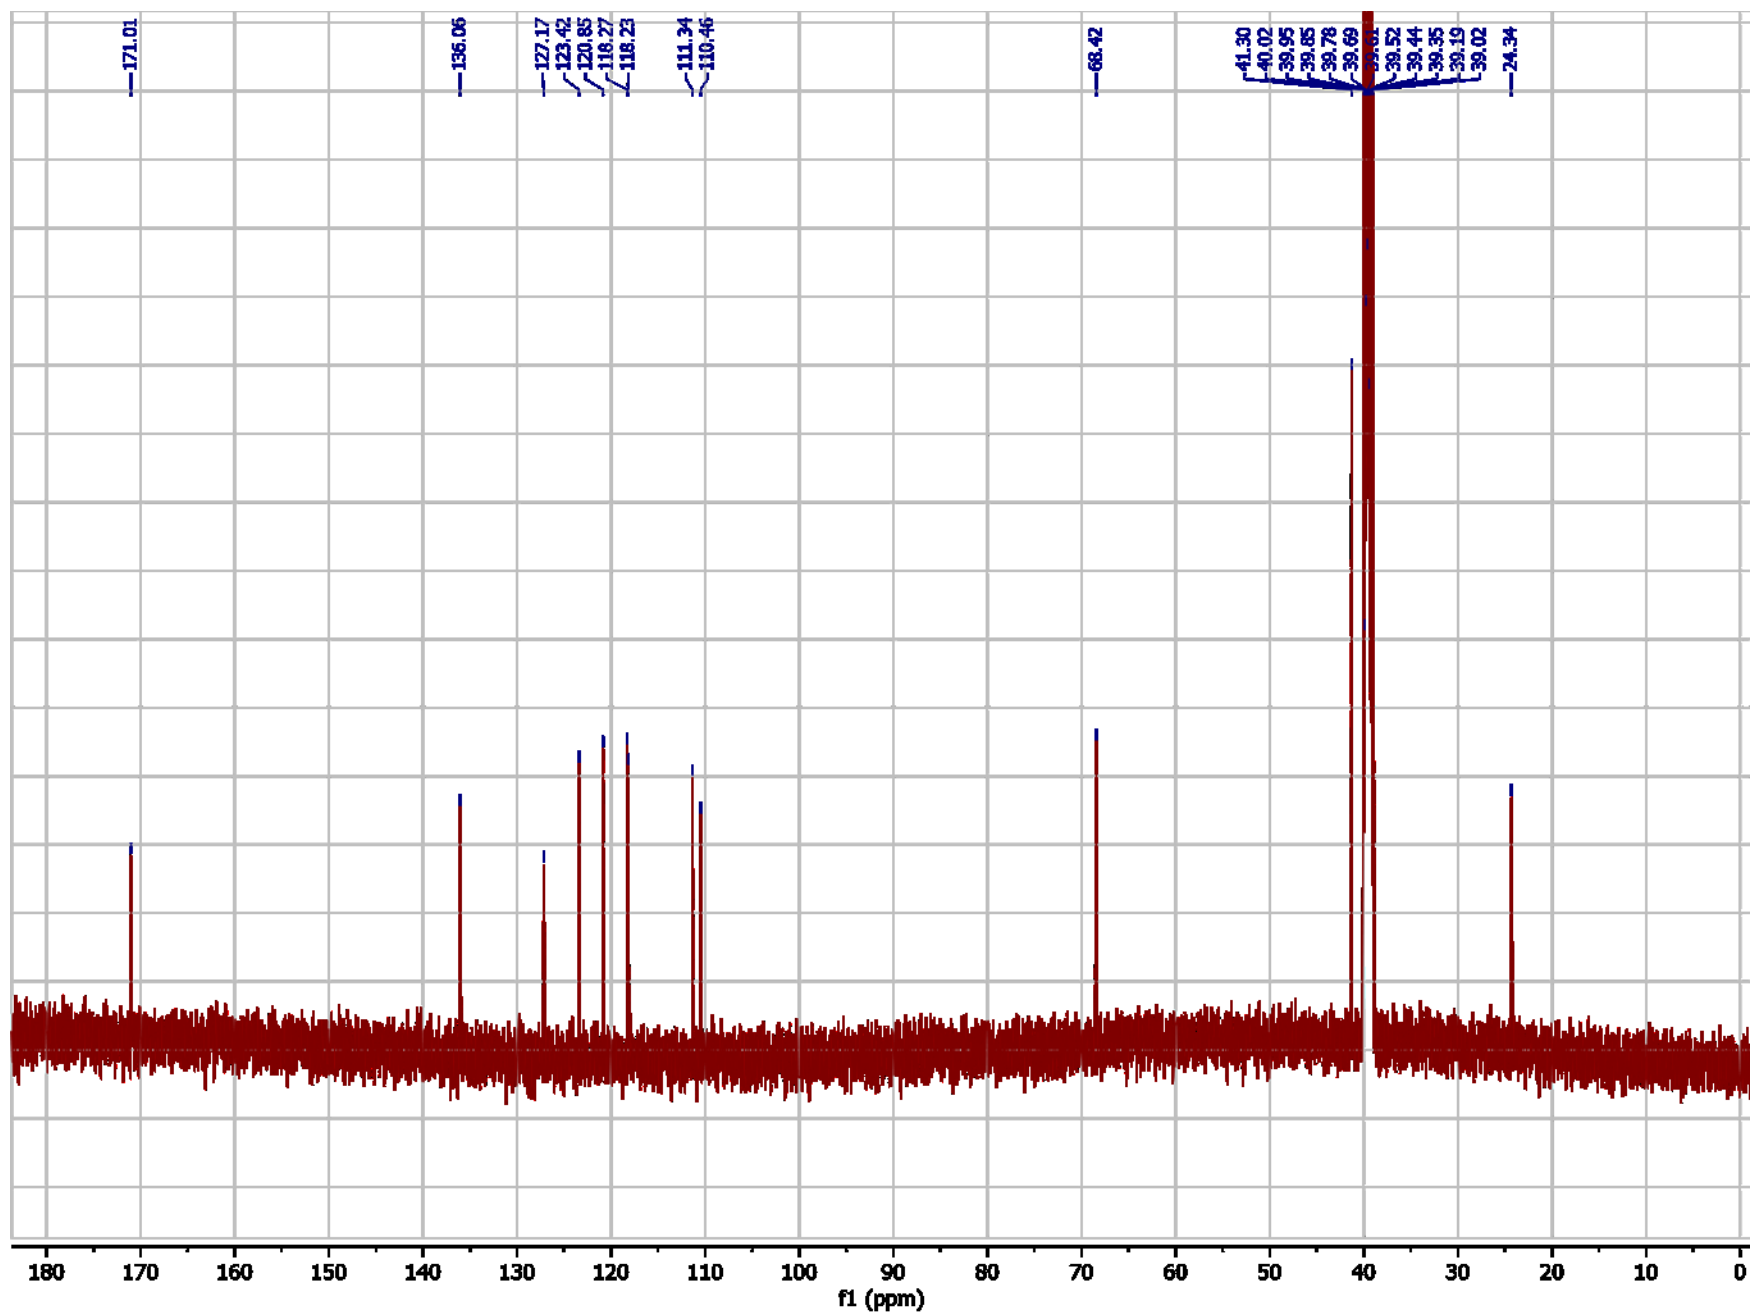

medip#1 (26),  $^1\text{H}$  NMR spectrum (500 MHz,  $\text{CD}_3\text{OD}$ )

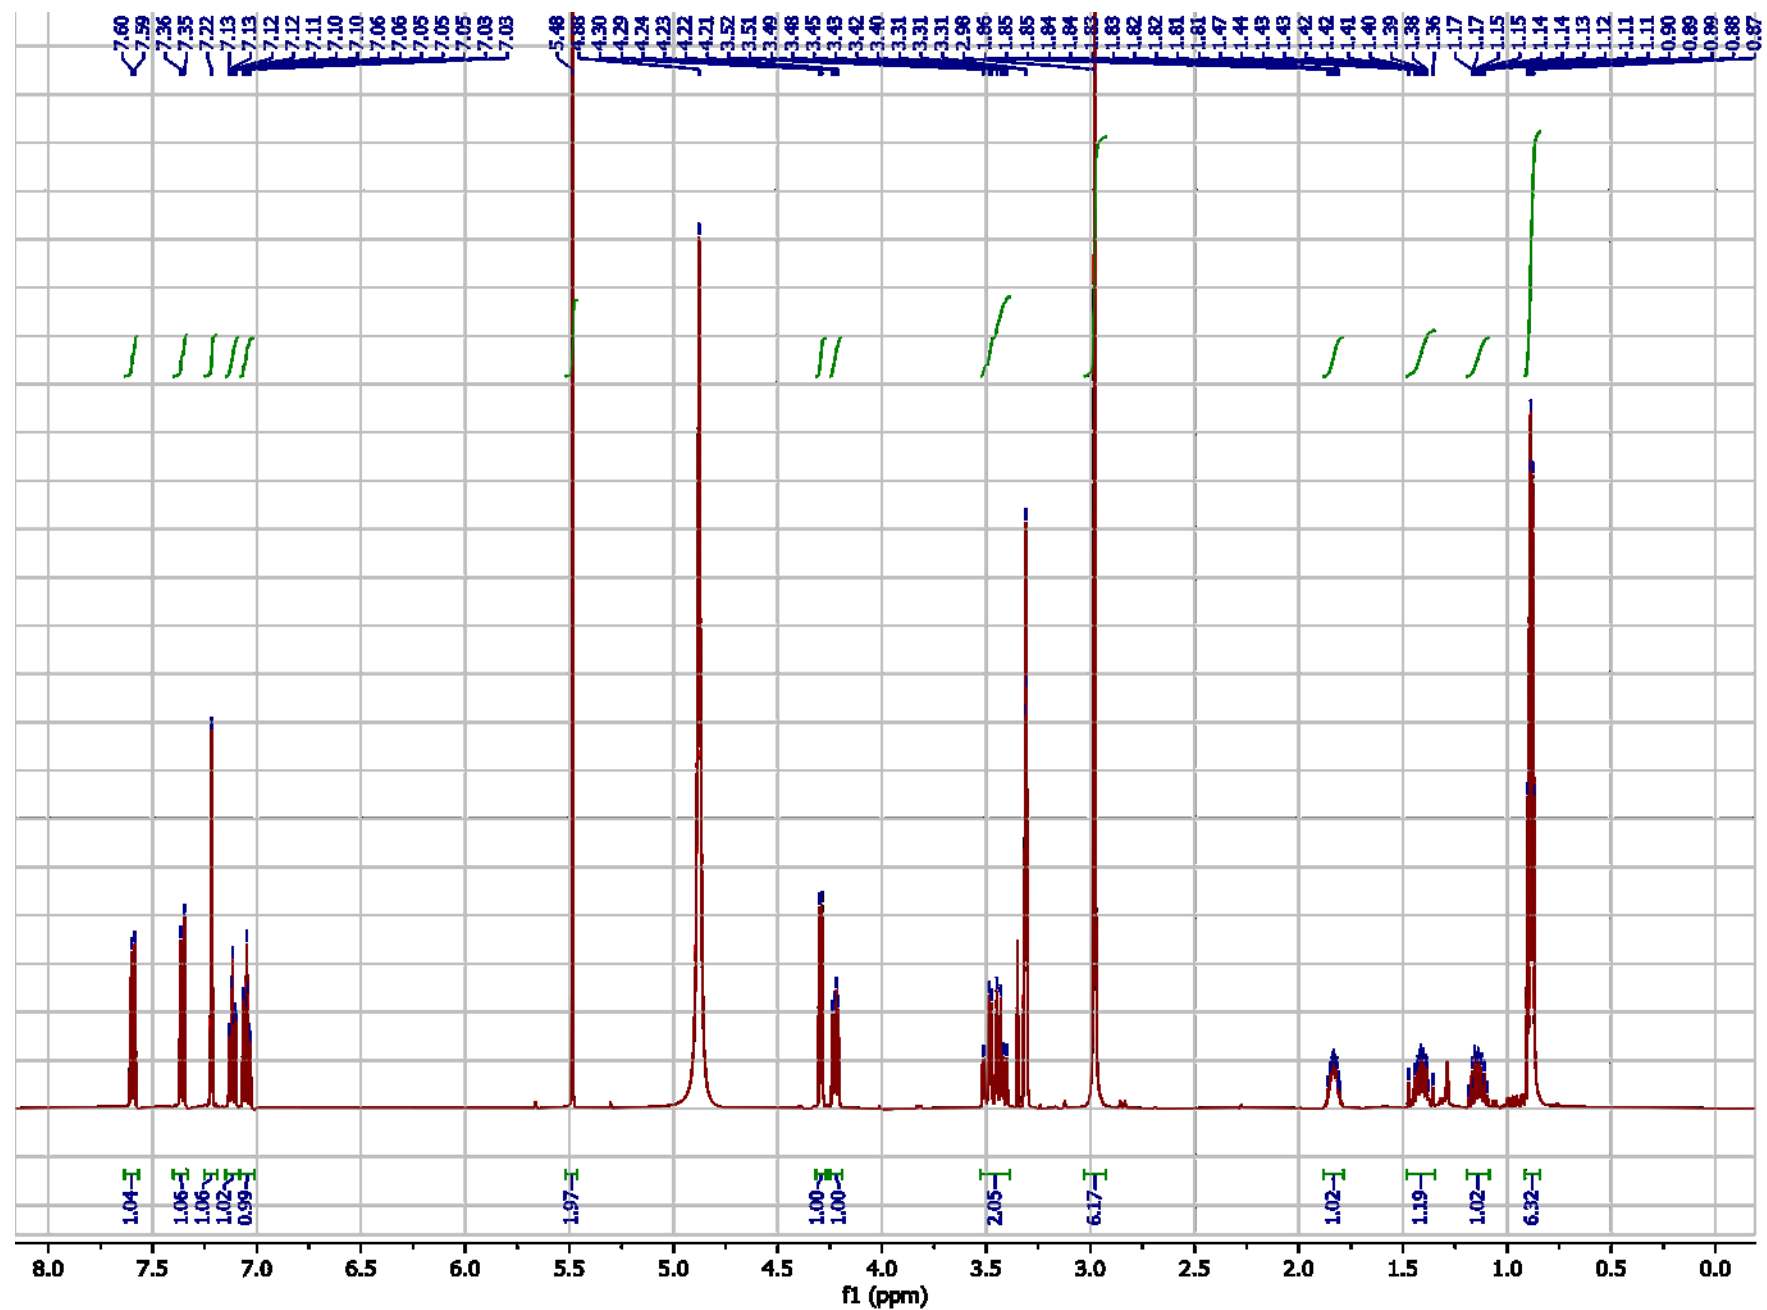

medip#1 (26),  $^{13}\text{C}$  NMR spectrum (101 MHz,  $\text{CD}_3\text{OD}$ )

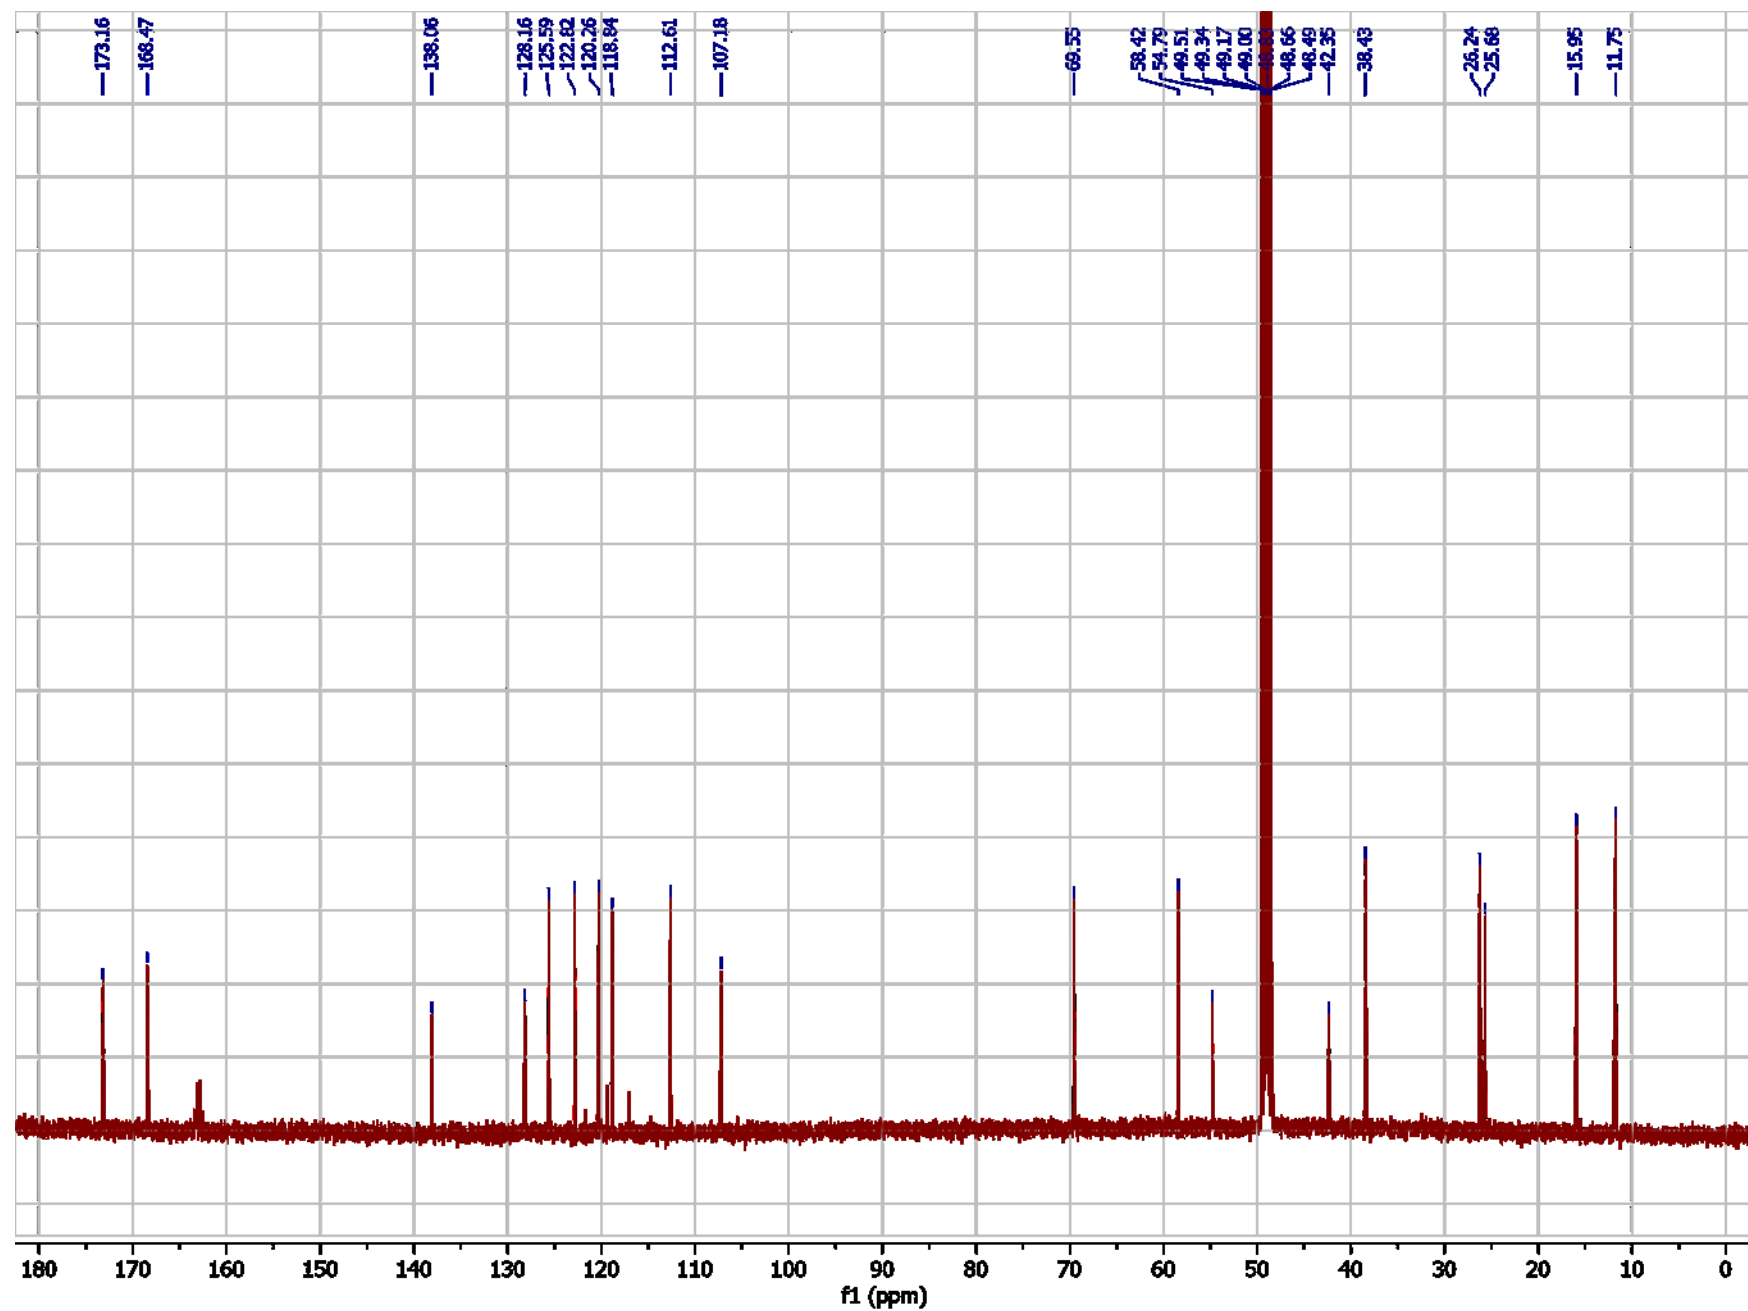

Trp-Ile, <sup>1</sup>H NMR spectrum (500 MHz, CD<sub>3</sub>OD)

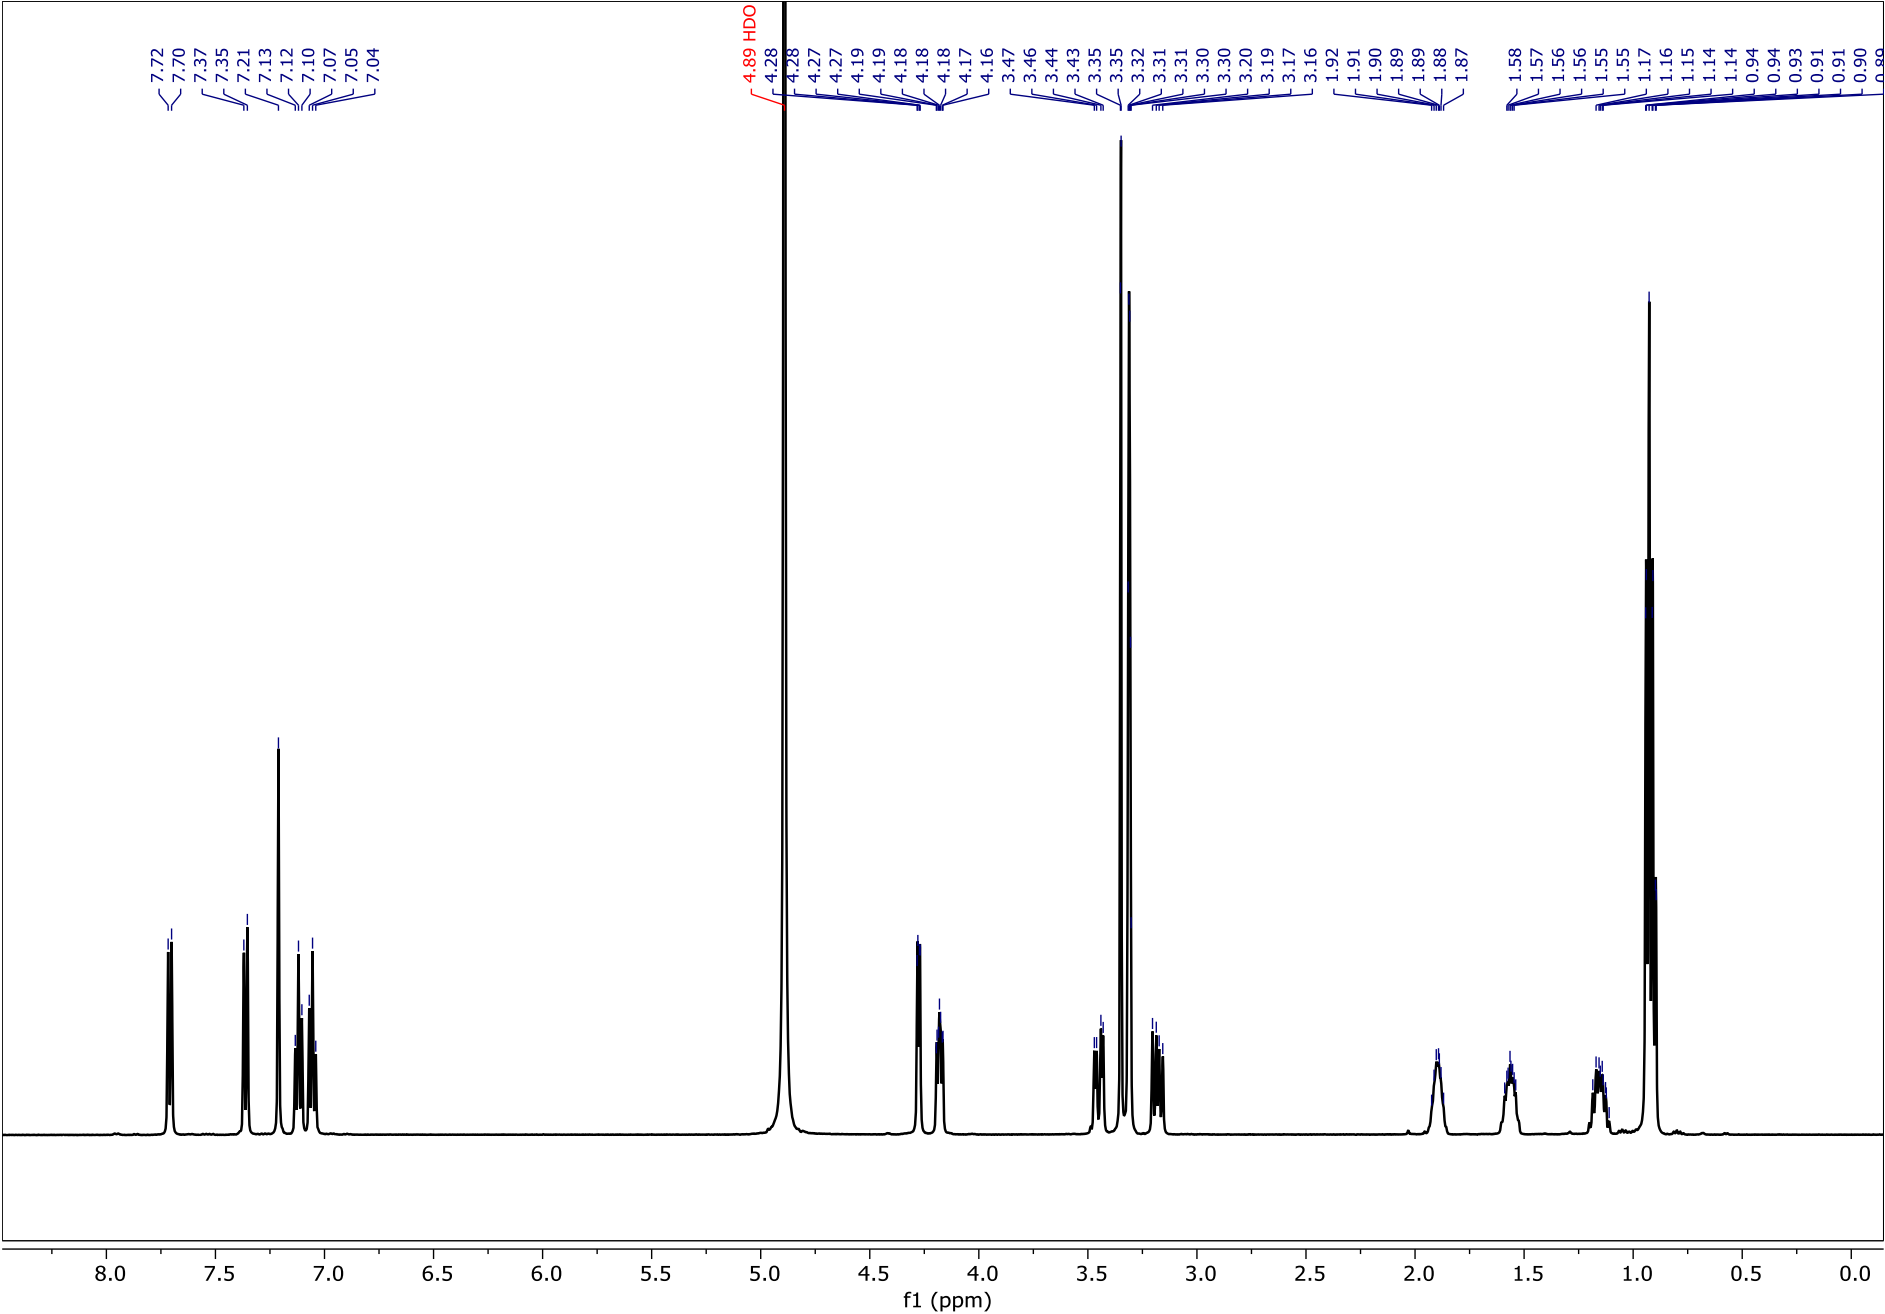

Trp-Ile, <sup>13</sup>C NMR spectrum (126 MHz, CD<sub>3</sub>OD)

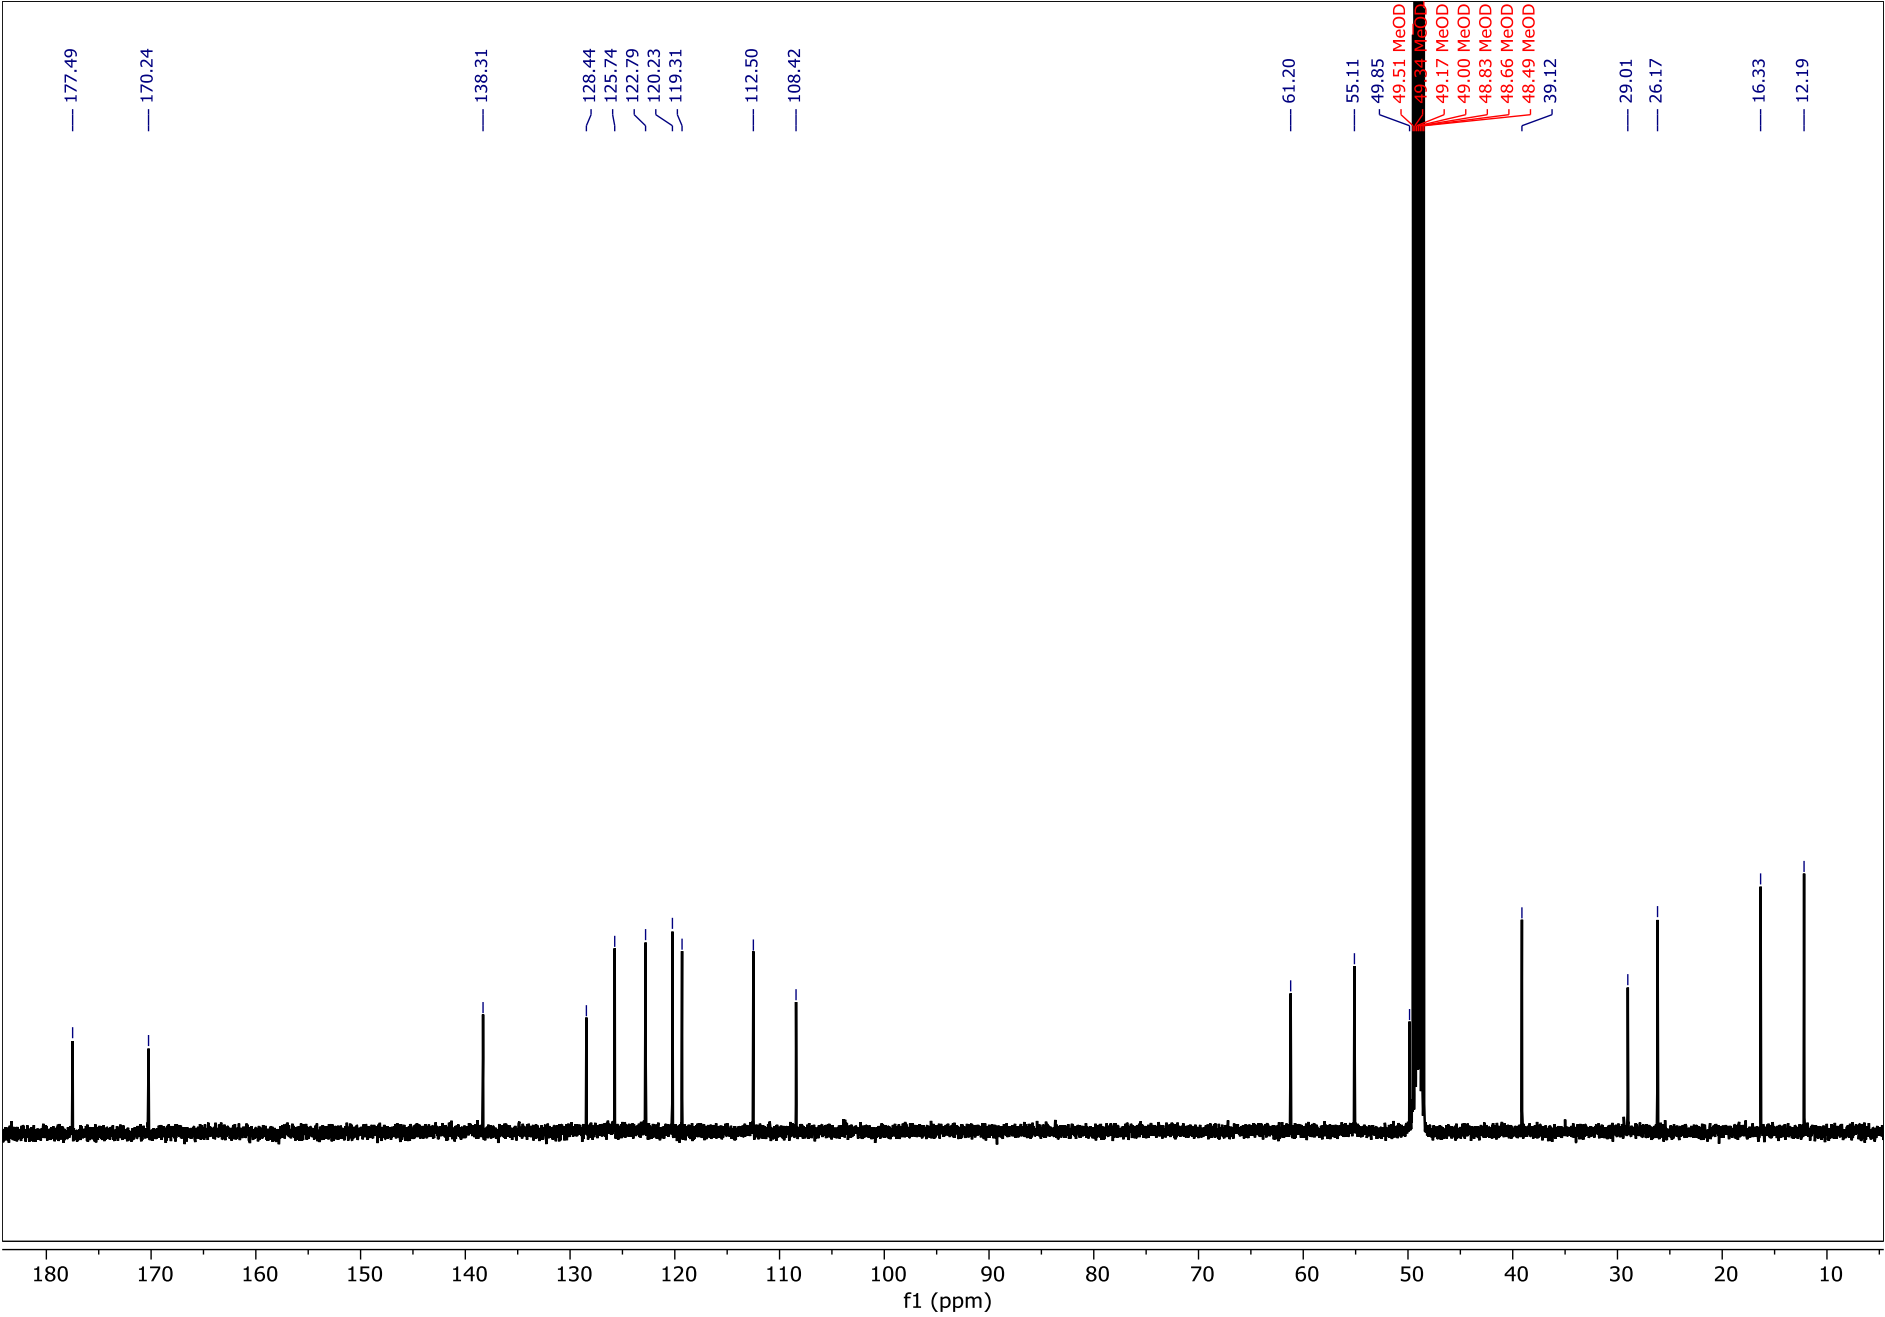



Ile-Trp, <sup>1</sup>H NMR spectrum (500 MHz, CD<sub>3</sub>OD)

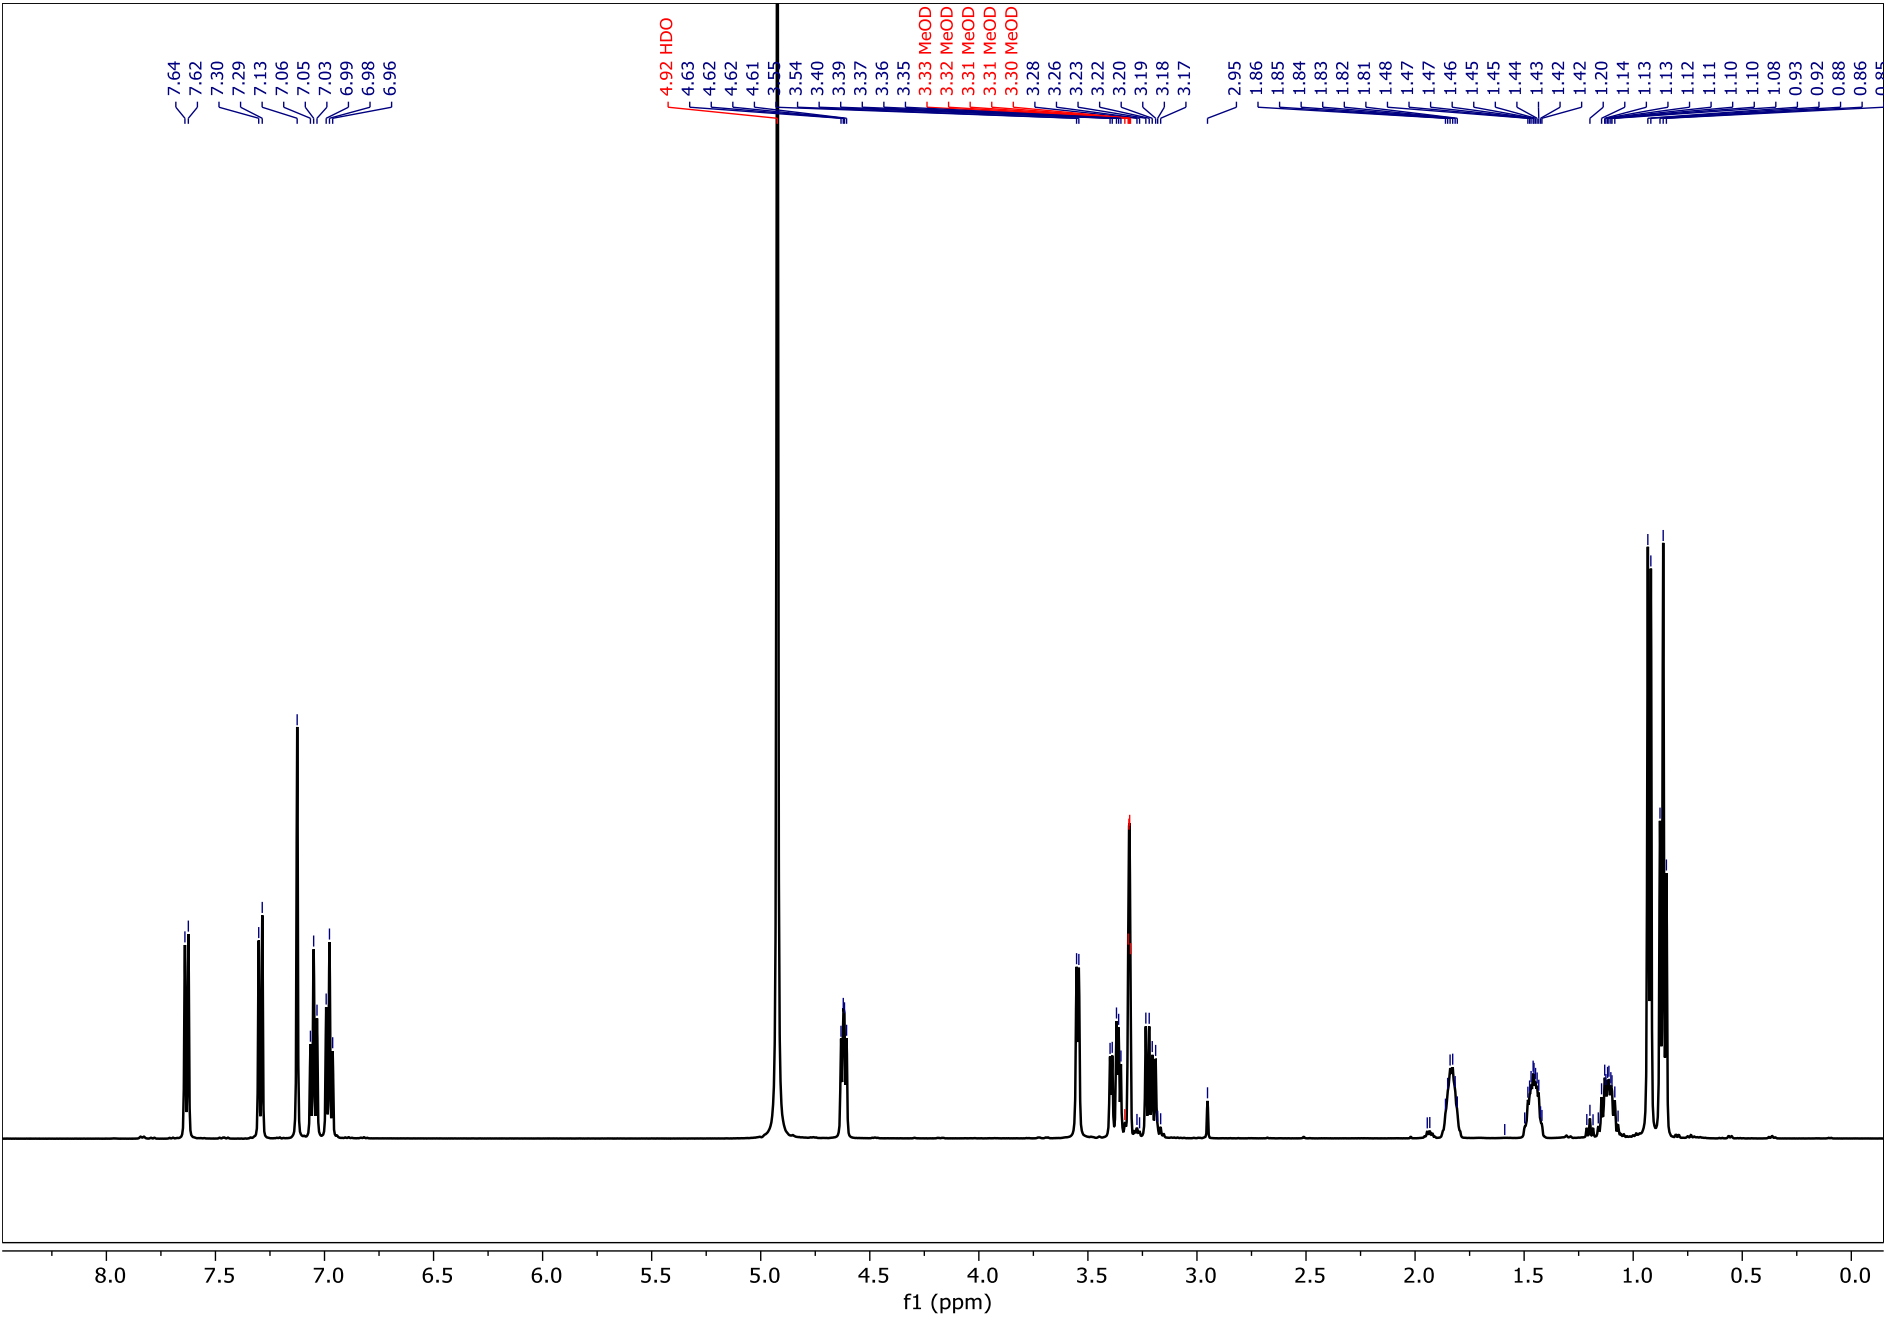

Ile-Trp, <sup>13</sup>C NMR spectrum (101 MHz, CD<sub>3</sub>OD)

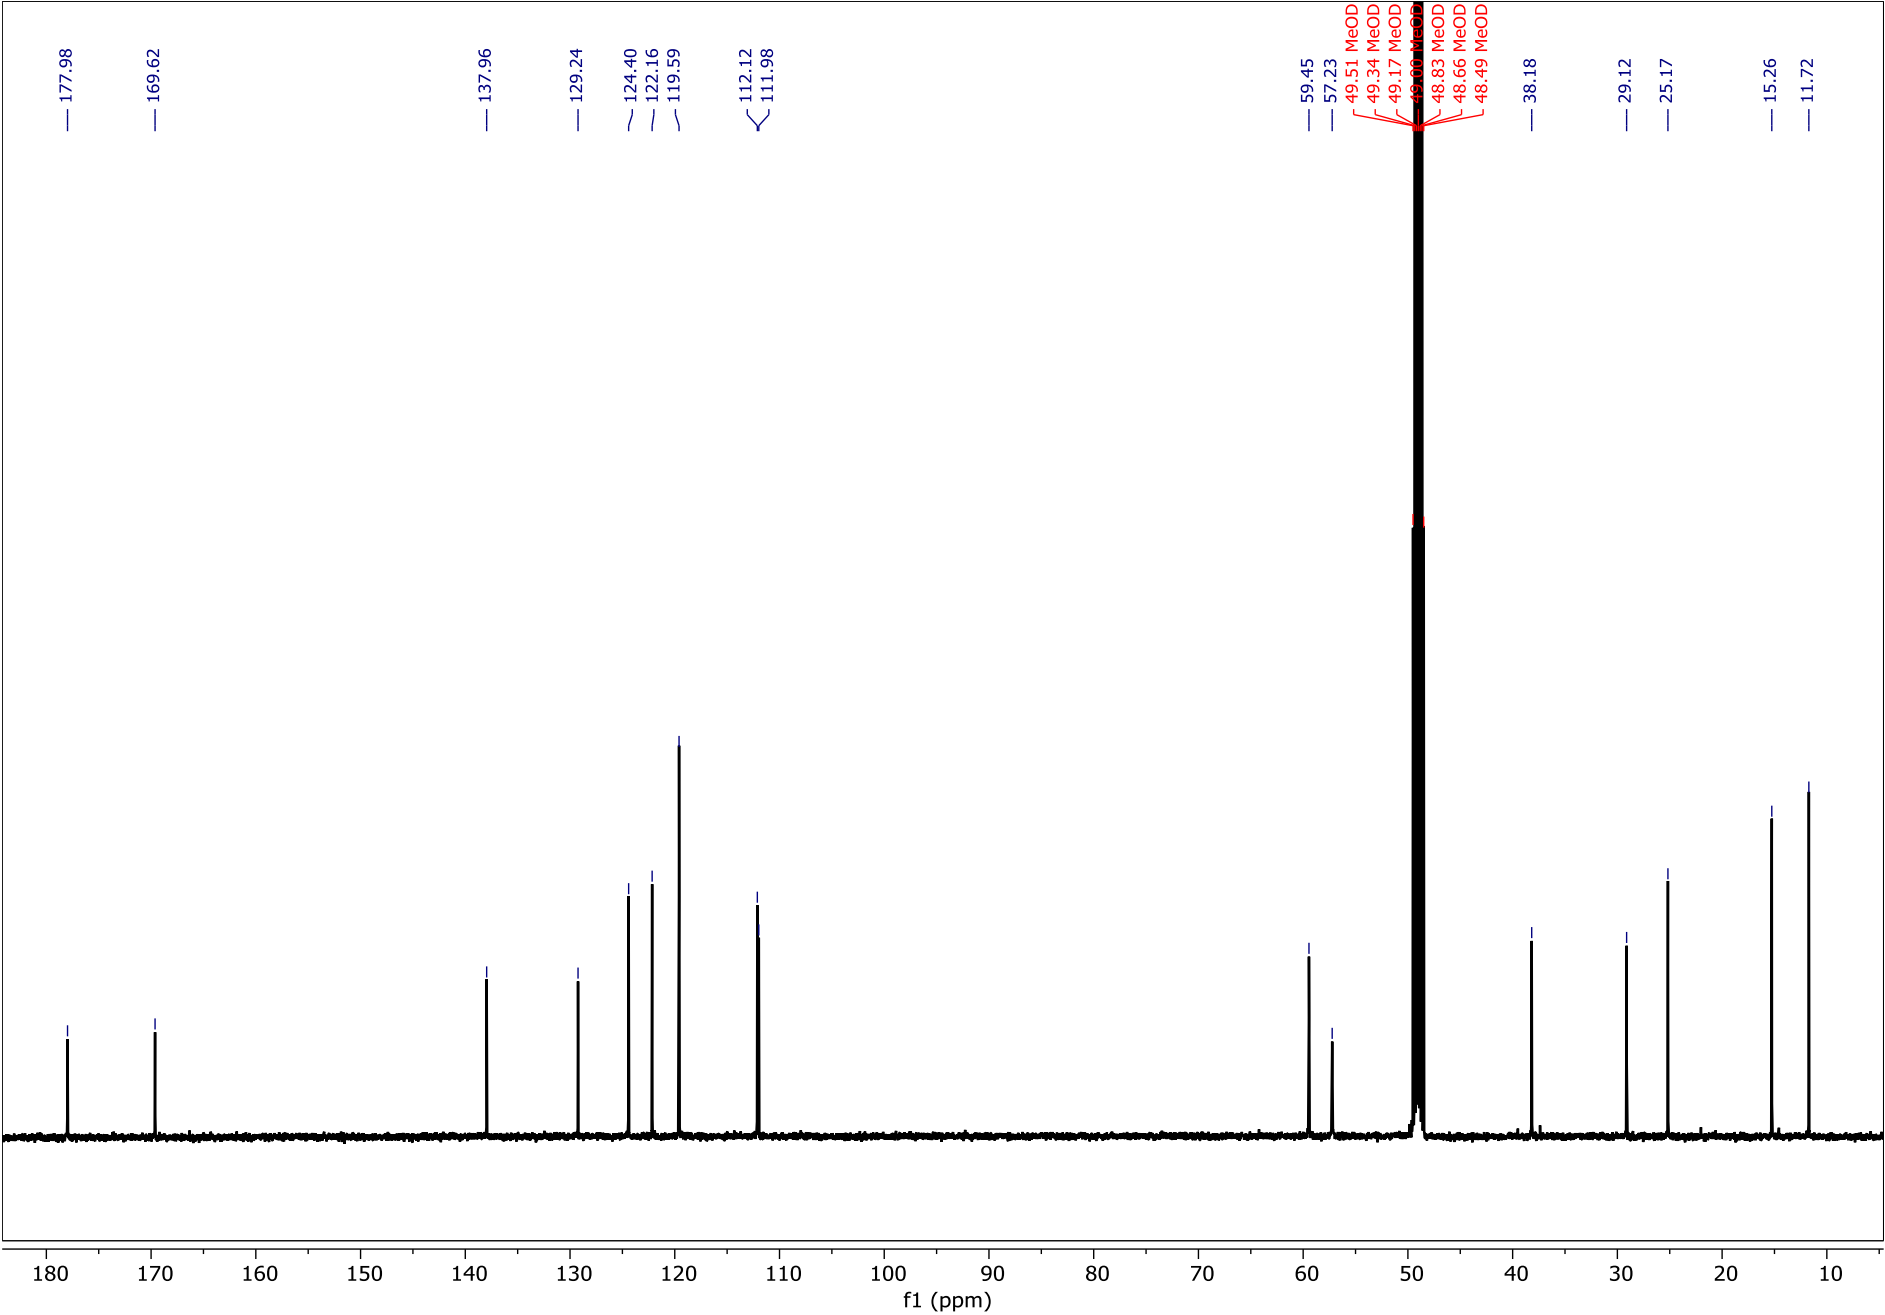

#### 4. Supplementary References

- 1 Brenner, S. The genetics of *Caenorhabditis elegans*. *Genetics* **77**, 71-94 (1974).
- 2 Sulston, J. & Hodgkin, J. *Methods*. (1988).
- 3 Ludewig, A. H. *et al.* An excreted small molecule promotes *C. elegans* reproductive development and aging. *Nat Chem Biol* **15**, 838-845, doi:10.1038/s41589-019-0321-7 (2019).
- 4 Aprison, E. Z. & Ruvinsky, I. Sexually Antagonistic Male Signals Manipulate Germline and Soma of *C. elegans* Hermaphrodites. *Curr Biol* **26**, 2827-2833, doi:10.1016/j.cub.2016.08.024 (2016).
- 5 Mok, D. Z., Sternberg, P. W. & Inoue, T. Morphologically defined sub-stages of *C. elegans* vulval development in the fourth larval stage. *BMC Dev Biol* **15**, 26, doi:10.1186/s12861-015-0076-7 (2015).
- 6 Aprison, E. Z. & Ruvinsky, I. Balanced trade-offs between alternative strategies shape the response of *C. elegans* reproduction to chronic heat stress. *PLoS One* **9**, e105513, doi:10.1371/journal.pone.0105513 (2014).
- 7 MacNeil, Lesley T., Watson, E., Arda, H. E., Zhu, Lihua J. & Walhout, Albertha J. M. Diet-Induced Developmental Acceleration Independent of TOR and Insulin in *C. elegans*. *Cell* **153**, 240-252, doi:http://dx.doi.org/10.1016/j.cell.2013.02.049 (2013).
- 8 Frand, A. R., Russel, S. & Ruvkun, G. Functional genomic analysis of *C. elegans* molting. *PLoS Biol* **3**, e312, doi:10.1371/journal.pbio.0030312 (2005).
- 9 Brandt, S. D., Moore, S. A., Freeman, S. & Kanu, A. B. Characterization of the synthesis of N,N-dimethyltryptamine by reductive amination using gas chromatography ion trap mass spectrometry. *Drug testing and analysis* **2**, 330-338, doi:10.1002/dta.142 (2010).
- 10 Hoki, J. S. *et al.* Deep Interrogation of Metabolism Using a Pathway-Targeted Click-Chemistry Approach. *J Am Chem Soc* **142**, 18449-18459, doi:10.1021/jacs.0c06877 (2020).
- 11 Wrobel, C. J. J. *et al.* Combinatorial Assembly of Modular Glucosides via Carboxylesterases Regulates *C. elegans* Starvation Survival. *J Am Chem Soc* **143**, 14676-14683, doi:10.1021/jacs.1c05908 (2021).
